# MegaBayesianAlphabet: Mega-scale Bayesian Regression methods for genome-wide prediction and association studies with thousands of traits

Jiayi Qu\*, Daniel Runcie<sup>†,1</sup> and Hao Cheng<sup>†,1</sup>

\*Department of Animal Science, University of California Davis, Davis, CA 95616, <sup>†</sup>Department of Plant Sciences, University of California Davis, Davis, CA 95616

**ABSTRACT** Large-scale phenotype data are expected to increase the accuracy of genome-wide prediction and the power of genome-wide association analyses. However, genomic analyses of high-dimensional, highly correlated data are challenging. We developed MegaBayesianAlphabet to simultaneously analyze genetic variants underlying thousands of traits using the flexible priors of the Bayesian Alphabet family. As a demonstration, we implemented the BayesC prior in the R package MegaLMM and applied it to both simulated and real data sets. Our analyses show that the resulting model MegaBayesC can effectively use high-dimensional phenotypic data to improve the accuracy of genetic value prediction, the reliability of marker discovery, and the accuracy of marker effect size estimation in genome-wide analyses.

**KEYWORDS** multi-trait; genomic prediction; genome-wide association studies; high-throughput phenotyping; Bayesian regression models

## Introduction

The advent of high density genome-wide single nucleotide polymorphism (SNP) arrays in the past decades has provided exciting new material for the genetic analysis of complex traits. Linear mixed models that can integrate such large-scale genomic data are widely used for genomic prediction (Meuwissen *et al.* 2001; VanRaden 2008) and genome-wide association studies (Visscher *et al.* 2017). Recent advance in multi-omics methodologies now provide opportunities to generate large-scale transcriptomic, metabolomic, and epigenomic profiles as well. The integration of these high-dimensional phenotypes into association studies can increase power to detect causal variants. For example, gene expression profiling in thousands of genes has been used for the identification of genes that affect transcriptional variation (i.e., eQTLs) (Gibson and Weir 2005; McGraw *et al.* 2011), and integrative approaches combining genomic and gene expression data can have higher power to capture the true pathway associations underlying human diseases and complex traits (Xiong *et al.* 2012). In addition, recent developments of high-throughput phenotyping platforms have made the collection of

thousands to millions of physiological measurements affordable to breeders (Araus *et al.* 2018). For example, images collected through thermal and hyperspectral cameras are used to increase the accuracy in genomic prediction for grain yield in wheat (Rutkoski *et al.* 2016). To further improve genomic prediction and to understand the underlying genetic mechanism, statistical models that enable the joint analysis of high-dimensional traits are required to establish the connection between phenomics and genomics.

Genomic analyses of high-dimensional, highly correlated data present analytic and computational challenges. The multi-variate linear mixed model (MvLMM) is a widely-used statistical model for the genetic analyses of two or more correlated traits (Henderson and Quaas 1976). However, most algorithms used to fit MvLMMs require repeated inversions of genetic and residual covariance matrices among all traits, with a computational burden that grows cubically to quintically as the number of traits increases (Zhou and Stephens 2014). MvLMMs are also susceptible to over-fitting unless sample sizes are very large. Re-parameterizing MvLMMs as Bayesian sparse factor models can alleviate much of this computational burden (Runcie and Mukherjee 2013; Runcie *et al.* 2021) and can significantly improve the accuracy of genomic prediction (Runcie *et al.* 2021). For example, BSFG and MegaLMM are based on the assumption that the covariances among large sets of traits can be explained by a small set of latent factors (e.g., through gene regulatory

doi: 10.1534/genetics.XXX.XXXXXX

Manuscript compiled: Friday 6<sup>th</sup> May, 2022

<sup>1</sup>Corresponding author: Department of Plant Sciences, Department of Animal Science, University of California Davis, 1 Shield Ave., Davis, CA 95616. E-mail: [deruncie@ucdavis.edu](mailto:deruncie@ucdavis.edu), [qtlcheng@ucdavis.edu](mailto:qtlcheng@ucdavis.edu).

networks), which is consistent with the discovery that variation in gene expressions of human diseases are mainly regulated by a few major disease-associated pathways (Xiong *et al.* 2012).

While MegaLMM addressed the statistical and computational challenges of applying MvLMMs to high-dimensional phenotypes, it permits a limited range of models for high-dimensional genotype data. Specifically, MegaLMM incorporates genomic data through one (or more) genomic relationship matrices, which imposes specific assumptions about the distribution and effect sizes of the underlying genetic variants, and does not allow direct inference on the identities of causal loci. Whole-genome regression methods such as the Bayesian Alphabet methods (Meuwissen *et al.* 2001; Park and Casella 2008; Kizilkaya *et al.* 2010; Habier *et al.* 2011; Cheng *et al.* 2015; Erbe *et al.* 2012; Cheng *et al.* 2018b), on the other hand, encode a wide range of different and more flexible distributions on the effect sizes of causal genomic loci and allow for inference of the causal loci themselves. However, fitting Bayesian Alphabet methods to very large numbers of markers can also be computationally demanding even for a single trait, and extensions of these methods to multivariate traits are very limited.

In this paper, we incorporate whole-genome regression approaches into a Bayesian sparse factor model named *MegaBayesianAlphabet* to incorporate thousands of traits for genome-wide prediction and association studies. The Bayesian Alphabet methods with mixture priors on marker effects (Kizilkaya *et al.* 2010; Habier *et al.* 2011; Moser *et al.* 2015; Wolc *et al.* 2016; Mehrban *et al.* 2017; Wang *et al.* 2020) are popular genetic models due to their incorporation of biologically meaningful assumptions and the variable selection procedure performed during model fitting. We focus on BayesC as an example of a Bayesian Alphabet method (Kizilkaya *et al.* 2010; Habier *et al.* 2011; Cheng *et al.* 2018b), but extensions of *MegaBayesianAlphabet* with other priors should be straightforward. We show that *MegaBayesianAlphabet* with BayesC prior (hereinafter referred to as *MegaBayesC*) can improve genomic prediction accuracy relative to multi-trait GBLUP and RR-BLUP methods by leveraging mixture priors on marker effects and information from thousands of traits. In association studies with millions of markers, *MegaBayesianAlphabet* is still computationally demanding, but we propose a two-step approach that can accurately estimate marker effects and improve power for association inference in both simulated and real data studies. *MegaBayesianAlphabet* is implemented in an R package called “*MegaLMM*”.

## Materials and Methods

In a conventional MvLMM, the genetic and non-genetic correlations among  $t$  traits are modeled through one or more  $t \times t$  genetic covariance matrices ( $\mathbf{G}_m$ ) and a  $t \times t$  residual covariance matrix ( $\mathbf{R}$ ), respectively. The computational cost of fitting a MvLMM can be prohibitive when  $t$  is large due to the difficulty in taking inverses of the covariance matrices (Gilmour *et al.* 1995; Yang *et al.* 2011; Zhou and Stephens 2014). To overcome the computational challenge and overfitting in conventional MvLMMs, we reparameterized the conventional MvLMM as a factor model (i.e., MegaLMM (Runcie *et al.* 2021) and *MegaBayesianAlphabet*), where  $K$  independent (unobserved) latent factors are introduced to account for the covariances among the  $t$  traits.

### Model Description

In *MegaBayesianAlphabet*, the variation among  $t$  observed traits is decomposed into two parts: the variation caused by dependen-

cies on  $K$  independent latent factors, which induces correlations among the  $t$  observed traits, and the variation that is unique, or idiosyncratic, to each trait. In *MegaBayesianAlphabet*, genetic values of latent factors are defined as a linear combination of all marker effects, and priors from the Bayesian Alphabet methods (Meuwissen *et al.* 2001; Park and Casella 2008; Kizilkaya *et al.* 2010; Habier *et al.* 2011; Cheng *et al.* 2015; Erbe *et al.* 2012; Cheng *et al.* 2018b) are assigned to the marker effects. The model specification of *MegaBayesianAlphabet* is described below.

$$\mathbf{Y} = \mathbf{F}\mathbf{A} + \mathbf{X}_1\mathbf{B}_1 + \mathbf{X}_{2R}\mathbf{B}_{2R} + \mathbf{E}_R \quad (1)$$

with

$$\mathbf{F} = \mathbf{X}_{2F}\mathbf{B}_{2F} + \mathbf{E}_F \quad (2)$$

where  $\mathbf{Y}$  is an  $n \times t$  matrix of observations for  $n$  individuals on  $t$  traits,  $\mathbf{F}$  is an  $n \times K$  matrix of latent factors for  $n$  individuals across  $K$  latent factors, and  $\mathbf{A}$  is a  $K \times t$  factor loading matrix whose elements, such as  $\lambda_{kj}$ , describe the corresponding factor-trait relationships (e.g., the relationship between factor  $k$  and trait  $j$ ). The  $K$  latent factors in  $\mathbf{F}$  are further decomposed into genetic effects (i.e.,  $\mathbf{X}_{2F}\mathbf{B}_{2F}$ ) and residual effects (i.e.,  $\mathbf{E}_F$ ) as shown in Equation 2. The genetic effects of latent factors are expressed as multiple regressions on genotype covariates, where  $\mathbf{X}_{2F}$  is an  $n \times b_{2F}$  matrix of genotype covariates, and  $\mathbf{B}_{2F}$  is a  $b_{2F} \times K$  matrix of marker effects for the  $K$  latent factors at  $b_{2F}$  genotyped loci.  $\mathbf{X}_1$  is an  $n \times b_1$  incidence matrix allocating the observations on  $t$  traits to  $b_1$  fixed effects with coefficient matrix  $\mathbf{B}_1$ . The residuals are similarly decomposed into trait-specific genetic effects (i.e.,  $\mathbf{X}_{2R}\mathbf{B}_{2R}$ ) and trait-specific residual effects (i.e.,  $\mathbf{E}_R$ ), with  $\mathbf{B}_{2R}$  being a  $b_{2R} \times t$  matrix of marker effects corresponding to the  $t$  traits at  $b_{2R}$  genotyped loci.

If all sources of correlation among observed traits are explained by the latent factors, the residuals conditional on these factors become uncorrelated between different traits. Since the sources of correlation among observed traits are explained by independent latent factors, samples at each iteration of Markov chain Monte Carlo (MCMC) can be obtained simultaneously in parallel across traits and factors, which leads to significant reduction in the computational cost of model fitting.

### Prior Specification

**Genetic Marker Effects** Mixture priors are widely used for genetic marker effects in Bayesian regression methods in genome-enabled analysis. In this paper, the BayesC prior is used for the marker effects (e.g., coefficients in  $\mathbf{B}_{2F}$ ) and we term this specific version of *MegaBayesianAlphabet*: *MegaBayesC*. The BayesC mixture prior assumes that marker effects are independently and identically distributed, each of which has a point mass at zero with a marker exclusion probability  $\pi$ , and follows a univariate normal distribution with a marker inclusion probability  $1 - \pi$ . For example, the prior distribution of the marker effect at locus  $i$  for the  $k$ th latent factor is shown as follows.

$$b_{2F_{k(i)}} = \begin{cases} N(0, \sigma_{B_{2F_k}}^2) & \text{probability } (1 - \pi_{F_k}) \\ 0 & \text{probability } (\pi_{F_k}) \end{cases}$$

where  $\sigma_{B_{2F_k}}^2$  is the variance of marker effects corresponding to factor  $k$ . Due to the independence among latent factors, and the independence among traits conditional on  $\mathbf{F}\mathbf{A}$ , marker effects can be efficiently sampled from a set of univariate BayesC

1 models in parallel across traits and factors at each iteration of  
 2 MCMC. We treat each marker exclusion probability for the  $K$   
 3 latent factors (e.g.,  $\pi_{F_k}$ ) and the  $t$  observed traits as an indepen-  
 4 dent unknown parameter to be estimated. Note that if marker  
 5 inclusion probabilities for all factors were set to 1.0 (i.e., all mark-  
 6 ers are included with equal variance), the model is equivalent to  
 7 RR-BLUP, and we term this specific version of MegaBayesianAl-  
 8 phabet: MegaRRBLUP.

9 **Factor Loading Matrix** The factor loading matrix ( $\Lambda$ ) describes  
 10 the relationship between latent factors and observed traits. Spar-  
 11 sity in this matrix implies that factors affect some, but not all  
 12 traits, a key assumption in Bayesian sparse factor models (Car-  
 13 valho *et al.* 2008). We use a BayesC mixture prior for the elements  
 14 of  $\Lambda$ . Because factor swaps do not change the likelihood, to im-  
 15 prove the identifiability of the model, we introduce an additional  
 16 parameter to the included-variable variance ( $\tau_k^{-1}$ ) that is stochas-  
 17 tically decreasing across factors (Bhattacharya and Dunson 2011;  
 18 Runcie and Mukherjee 2013; Runcie *et al.* 2021). For the factor  
 19 loading that describes the relationship between factor  $k$  and trait  
 20  $j$  (i.e.,  $\lambda_{kj}$ ), its prior distribution is shown as follows.

$$\lambda_{kj} = \begin{cases} N(0, \tau_k^{-1} \sigma_{R_j}^2) & \text{probability } (1 - \pi_{\Lambda_k}) \\ 0 & \text{probability } (\pi_{\Lambda_k}) \end{cases} \quad (3)$$

$$\tau_k = \prod_{h=1}^k \delta_h$$

$$\delta_1 = 1$$

$$\delta_h \sim \text{Gamma}(a_\delta, b_\delta), h = 2 \dots k$$

$$\sigma_{R_j}^2 \sim \text{Inv-Gamma}(a_\sigma, b_\sigma)$$

21 Through the prior specification of  $\Lambda$ , an appropriate level of  
 22 truncation on the rows of  $\Lambda$  is able to ensure that the contribution  
 23 from additional factors beyond the truncation point is negligible  
 24 (Bhattacharya and Dunson 2011).

25 **Other priors** All other prior distributions are the same as used  
 26 in Runcie *et al.* (2021).

### 27 **Posterior Distributions for Gibbs Sampler**

28 We use MCMC method to sample from the posterior distribu-  
 29 tions of all parameters. The full conditional posterior distribu-  
 30 tions for Gibbs sampler are derived for all the parameters in  
 31 MegaBayesC in Appendix.

### 32 **Estimation of Genetic Values for Genomic Prediction**

33 We assessed the performance of MegaBayesC as a tool for ge-  
 34 nomic prediction using hyperspectral data as additional traits to  
 35 assist wheat yield prediction.

36 **Data Description** Best linear unbiased estimators (BLUEs) of  
 37 grain yield and reflectances from 62 wavelength bands collected  
 38 with an areal hyperspectral camera on each of 10 time-points  
 39 during the growing season for 1033 bread wheat lines were  
 40 downloaded from CIMMYT Research Data (Krause *et al.* 2019).  
 41 We analyzed results from the 2014-2015 breeding cycle under  
 42 the Optimal Flat treatment. All lines were genotyped using the

pipeline described in Poland *et al.* (2012). Markers with call  
 rate  $\leq 50\%$  and minor allele frequency (MAF)  $\leq 0.05$  were re-  
 moved. Missing genotypes were imputed by corresponding  
 marker means. In our analysis, the 620 hyperspectral BLUEs  
 were used as secondary traits (Runcie and Cheng 2019) to im-  
 prove the prediction of the genetic value of grain yield, which  
 is served as a focal trait in our prediction scenario. Both sets of  
 traits were combined into a  $1033 \times 621$  trait matrix  $\mathbf{Y}$ .

51 **Models** Four different models were used to predict the  
 52 grain yield (GY): GBLUP, MegaGBLUP, MegaRRBLUP, and  
 53 MegaBayesC. Posterior means were used as point estimates of  
 54 parameters of interest. These four models are described below.

55 **GBLUP** A conventional single-trait GBLUP model (Van-  
 56 Raden 2008) with a variance-covariance matrix proportional to  
 57 a genomic relationship matrix  $\mathbf{K}$  fitted to the grain yield BLUEs,  
 58 ignoring the hyperspectral data.

59 **MegaGBLUP** This model was described in Runcie *et al.*  
 60 (2021). The fixed effects  $\mathbf{B}_1$  included intercepts only. The ran-  
 61 dom effects  $\mathbf{B}_{2R}$  and  $\mathbf{B}_{2F}$  were not included in the model. A  
 62 random effect with covariance proportional to  $\mathbf{K}$  was included  
 63 in Equations 1 and 2 to model the genetic relationships among  
 64 lines.

65 **MegaBayesC** The estimated individual genetic merits of  
 66 grain yield in MegaBayesC were computed as:  $\mathbf{u}_{GY} = \mathbf{X}_{2F} \hat{\mathbf{B}}_{2F} \hat{\lambda}_1$ ,  
 67 where  $\hat{\lambda}_1$  denotes the first column of  $\hat{\Lambda}$ , which specifies the es-  
 68 timated relationship between all factors and grain yield.  $\mathbf{B}_1$   
 69 included only an intercept, and  $\mathbf{B}_{2R}$  was not included. We in-  
 70 cluded one factor having non-zero effects only on grain yield,  
 71 i.e.,  $\lambda_{GY}^T = [1 \ 0 \ 0 \ \dots \ 0]_{1 \times t}$ , to model direct genetic effects  
 72 on grain yield. For the remaining factors, the probability of a  
 73 element from  $\Lambda$  being zero was considered as known and set to  
 74 be 0.9 to introduce sparsity to  $\Lambda$  and to shorten the time required  
 75 for its convergence, while the probability of a marker having a  
 76 null effect on a latent factor was considered as unknown and  
 77 was estimated.  $K = 100$  factors were fitted in MegaBayesC.

78 **MegaRRBLUP** This model mimics the priors for marker ef-  
 79 fects in RR-BLUP. The only difference between MegaRRBLUP  
 80 and MegaBayesC lies in the prior distributions of marker effects  
 81 on latent factors. Normal distributions instead of mixture priors  
 82 are used for marker effects in MegaRRBLUP, indicating that all  
 83 markers are included in the model. This model should be iden-  
 84 tical to MegaGBLUP except that the prior on elements of  $\Lambda$  is  
 85 BayesC instead of the Bayesian Horseshoe.

86 **Cross Validation** We used cross-validation to evaluate the pre-  
 87 dictive performance of different models by masking the grain  
 88 yield of 516 randomly selected lines (around 50% of the popula-  
 89 tion) of the population during model fitting and comparing the  
 90 masked values to model predictions. Since we did not mask the  
 91 hyperspectral data from these 516 model validation individuals,  
 92 but used those data to enhance our genetic value predictions,  
 93 using the Pearson's correlation between predicted and observed  
 94 GY values could lead to biased and sub-optimal choices of mod-  
 95 els (Runcie and Cheng 2019). Instead, we used the estimated ge-  
 96 netic correlation corrected by grain yield heritability to estimate  
 97 the prediction accuracy (Runcie and Cheng 2019; Daetwyler *et al.*  
 98 2013) as implemented in Runcie *et al.* (2021). The cross-validation  
 99 process was repeated 20 times with different masked lines.

### 100 **Estimation of Marker Effects for Association Inference**

101 In MegaBayesianAlphabet, covariances among high-  
 102 dimensional phenotypic data are decomposed into  $K$  sources



of variation, each of which controls the correlation among a subset of observed traits through the factor loading matrix. In this way, information of correlated traits is used jointly to estimate their underlying pathways (i.e., latent factors), while the computational burden to analyze large-scale phenotypic data is significantly decreased. With the assistance of large-scale genetically correlated traits, MegaBayesianAlphabet is expected to boost the discovery of genetic variants associated with a trait of most interest (i.e., focal trait) and precisely quantify their effect sizes.

In this section, two simulation studies and one real data analysis were conducted to investigate the accuracy of the estimation of marker effects by MegaBayesC. First, a population with independent and uncorrelated SNPs was simulated to demonstrate the ability of MegaBayesC to distinguish the genetic and non-genetic sources of variation in a focal trait, utilizing the information of correlated traits. Second, a simulation study based on a real Arabidopsis population was conducted to study the effects of population structure and linkage among markers. Finally, the real phenotypes of flowering time from this Arabidopsis population was studied, utilizing expression data from 20,843 genes.

**Simulated Study in A Population without structure or Linkage Disequilibrium** We created a simulated population of  $n = 5000$  individuals and  $p = 2,000$  SNPs. An  $n \times p$  matrix of genotypic covariates was generated by random sampling from  $\{0, 1, 2\}$ . We then created simulated phenotypic data for a single focal trait and many correlated “secondary” traits. The performance of MegaBayesC was compared to a single-trait BayesC model (ST-BayesC) based on the accuracy of estimated marker effects for the focal trait. We induced genetic and non-genetic covariation among the traits through latent factors. The majority of variance in the focal trait was attributed to the latent factors. In Scenario 1, we created latent factors whose variation was primarily determined by the genetic markers (i.e. high-heritability latent factors), and in Scenario 2, the latent factors were predominantly non-genetic (i.e. low-heritability factors).

We studied four parameters that we expected to influence the relative performance of MegaBayesC and ST-BayesC. They are 1) the number of latent factors ( $n_{factor}$ ), 2) the number of correlated traits ( $n_{trait/factor}$ ) controlled by each factor, 3) the number of QTL (i.e., causal variants) that control each factor ( $n_{qtl/factor}$ ), and 4) the heritability of the factors. In this simulation study,  $n_{factor} = \{2, 6, 9\}$ ,  $n_{trait/factor} = \{2, 20\}$ ,  $n_{qtl/factor} = \{10, 20, 30\}$ , and two heritable patterns of latent factors were considered.

To generate the simulated phenotype data, we first used  $n_{factor}$  and  $n_{trait/factor}$  to construct a factor loading matrix ( $\Lambda$ ). For example, when  $n_{trait/factor} = 2$  and  $n_{factor} = 2, 4$  (i.e.,  $n_{factor} \times n_{trait/factor}$ ) observed traits were simulated, with two different observed traits linked to each factor. Since the first observed trait was treated as the focal trait, and all factors were assumed to contribute to its variation, factor loadings in the first column of  $\Lambda$  were set to 1. To minimize the complexity of this simulation, non-zero factor loadings in  $\Lambda$  were set to be equal to 1. Therefore, the simulated  $\Lambda$  given  $n_{trait/factor} = 2$  and  $n_{factor} = 2$  was expressed as:

$$\Lambda = \begin{bmatrix} 1 & 1 & 0 & 0 \\ 1 & 0 & 1 & 1 \end{bmatrix}$$

Based on the constructed  $\Lambda$ , all factors except the first factor were linked to  $n_{trait/factor} + 1 = 3$  observed traits, while the first factor was linked to  $n_{trait/factor} = 2$  observed traits. A similarly structured  $\Lambda$  was constructed for other combinations of  $n_{trait/factor}$  and  $n_{factor}$ .

After defining  $\Lambda$ , genetic variation controlled by selected QTL and non-genetic variation in each factor were simulated.  $n_{qtl/factor}$  QTL were selected for each factor, and variation was simulated such that the variance explained by these QTL was a defined percentage of the total variation in the factor. In Scenario 1, the QTL accounted for 95% of the variance of each factor (i.e.,  $\sigma_{FG}^2 / (\sigma_{FG}^2 + \sigma_{FE}^2) = 0.95$  with  $\sigma_{FG}^2$  being the genetic variance of factors and  $\sigma_{FE}^2$  being the residual variance of factors). In Scenario 2, only the first factor was associated with QTL (again with 95% of its variance explained by the QTL), and the remaining factors had independent variation. Finally, additional trait-specific variance was added to each trait, accounting for approximately 10% of its total variance.

As a consequence of these simulation choices, the two scenarios differed in several key aspects of the genetic architecture and correlation structures between the focal trait and the secondary traits. In Scenario 1, all factors were controlled predominantly by genetic variation and all QTL for every factor was therefore a QTL for the focal trait. Therefore, all secondary traits had strong genetic correlations with the focal trait. In Scenario 2, most factors were controlled by non-genetic variation; only the first factor was controlled by QTL. Therefore while all secondary traits were phenotypically correlated with the focal trait, most of these correlations were non-genetic.

In both scenarios, as  $n_{factor}$  and/or  $n_{qtl/factor}$  increased, the magnitude of variation explained by each QTL decreased to hold the total percentage of variation in the focal trait explained by QTL constant. In Scenario 1, when  $n_{factor} = 9$  and  $n_{qtl/factor} = 10$ , the 90 QTL each explained  $\approx 0.97\%$  of the total variance (Figure 3). As  $n_{qtl/factor}$  increased to 30, the number of QTL for the focal trait increased to 270 and each accounted for around 0.29% of the total variance of focal trait. In Scenario 2, when  $n_{factor} = 9$ , the variance explained by each marker decreased from 0.90% to 0.31% as the number of QTL increased from 10 to 30. For a given  $n_{factor}$  and  $n_{qtl/factor}$  the per-QTL effect sizes were comparable, but since there were more factors with QTL in Scenario 1, the total variance in the focal trait controlled by all QTL was larger.

In Scenario 2, as  $n_{factor}$  increased, the proportion of variance explained by QTL decreased. For example, when  $n_{factor} = 6$ , the genetic variance accounted for 14% of the total variance of focal trait. With  $n_{factor} = 9$ , the percent of variance explained by genetic markers decreased to 9%. In Scenario 1, the percentage of variance explained by QTL was constant across values of  $n_{factor}$ . In this scenario, all QTL for all factors contributed to the variation in the focal trait. For example, when  $n_{factor} = 6$  and  $n_{qtl/factor} = 10$ , each factor was influenced by 10 QTL, which were randomly selected from all SNPs, leading to a total of 60 QTL selected. During this process, some SNPs may be stochastically selected more than once, and thus, some QTL may have effects on more than one factor.

Based on the combination of  $n_{trait/factor}$ ,  $n_{factor}$ ,  $n_{qtl/factor}$  and the heritable patterns, a total of  $3 \times 3 \times 2 \times 2$  conditions were studied in this simulation study. 10 replicates were conducted for each of the 36 conditions.

When fitting models to these simulated data, we included the intercept for each trait as the only fixed effect. The model specifi-

1 cation of MegaBayesC was similar to that used in the **Genomic**  
 2 **Prediction** application, except: 1) no fixed factor loadings were  
 3 included in  $\Lambda$ , 2) the probability of a element from  $\Lambda$  being zero  
 4 was considered as unknown and was estimated, 3) the number  
 5 of factors fitted in the model was  $K = 10$ . We estimated the  
 6 total marker effects on the focal trait obtained by MegaBayesC  
 7 as:  $\alpha_f = \mathbf{B}_{2F}\lambda_1$ , where  $\mathbf{B}_{2F}$  is the matrix of marker effects of  
 8 latent factors and  $\lambda_1$  denotes the first column of  $\Lambda$  specifying  
 9 the relationship between factors and focal trait, i.e., summing  
 10 up the QTL effects on the latent factors weighted by the relation-  
 11 ships between each factor and the focal trait. We measured the  
 12 performance of each method (i.e., MegaBayesC and ST-BayesC)  
 13 by calculating the square root of the mean square error (RMSE)  
 14 of estimated marker effects.

15 **Simulation Study in a Real Arabidopsis Population** We created  
 16 a second set of simulated datasets based on real genotypes  
 17 from 1003 Arabidopsis thaliana accessions. Genotype data were  
 18 downloaded from the 1001 genomes project (Alonso-Blanco *et al.*  
 19 2016). In a real population, the presence of linkage disequilibrium  
 20 (LD) between loci and variable allele frequencies among  
 21 markers increase the complexity of genetic association analy-  
 22 ses. We removed SNPs with  $MAF \leq 0.05$  and missing genotype  
 23 rate  $\geq 0.1$  using PLINK 1.9 (Purcell *et al.* 2007), leaving 802,427  
 24 variants used for downstream analysis.

25 To ensure the QTL were independent, we pruned SNPs with  
 26 an LD threshold of 0.8 in windows of 500 SNPs, using a sliding  
 27 window of 100 SNPs. We randomly selected 20 QTL from these  
 28 SNPs, and generated 10 latent factors, each was affected by 2  
 29 different QTL. In this simulation, the structure of the variance  
 30 of the focal trait was simplified. All genetic variance in all traits  
 31 was driven by the QTL effects on the latent factors, while all  
 32 non-genetic variance was trait-specific. In this way, the observed  
 33 traits ( $\mathbf{Y}$ ) was expressed as:  $\mathbf{Y} = \mathbf{X}_2\mathbf{B}_{2F}\Lambda + \mathbf{E}_R$ .

34 We set each element of the first column of  $\Lambda$  to 0.5 so that  
 35 all 10 of the factors contributed equally to the focal trait. Each  
 36 factor was additionally linked to 20 different secondary traits  
 37 with factor loadings equal to 1. Other elements in  $\Lambda$  were set to  
 38 be 0. Therefore, a total of 201 traits were simulated.

39 The proportion of genetic variance in the focal trait was set  
 40 to be around 60% (i.e.,  $h_{focal}^2 = 0.6$ ). To ensure that the variance  
 41 explained by each QTL was consistent ( $\approx 1 - 5\%$  of the total  
 42 variance), QTL effects were sampled from a uniform distribution  
 43  $U(3, 5)$ , and a randomly chosen half of those effects were multi-  
 44 plied by  $-1$ . In addition, since the heritability of secondary traits  
 45 such as gene expression is often higher than that of focal trait  
 46 in real data applications, the heritabilities of the 200 secondary  
 47 traits were each set to be 0.8.

48 Finally, to parallel our real data analysis below, secondary  
 49 trait data was simulated for only 649 of the 1003 Arabidopsis  
 50 accessions. The 354 remaining accessions had the records for  
 51 only the focal trait.

52 After creating the simulated data, we applied three meth-  
 53 ods to identify QTL and estimate their effects on the focal trait:  
 54 1) single-trait Genome-Wide Association Studies (GWAS) us-  
 55 ing GCTA (Yang *et al.* 2011) (ST-GCTA); 2) single-trait BayesC  
 56 implemented in JWAS (Cheng *et al.* 2018a) (ST-BayesC); and 3)  
 57 MegaBayesC implemented in MegaLMM. Since whole-genome  
 58 regression models with hundreds of thousands of candidate  
 59 markers are computationally prohibitive, a two-stage analysis  
 60 was implemented for ST-BayesC and MegaBayesC. In the first  
 61 stage (i.e., the pre-selection stage), we selected a small proportion  
 62 of SNPs to take forward into a full BayesC analysis by running a

single-trait GWAS using GCTA on only the 354 individuals with-  
 out records on secondary traits. After running the GWAS, we  
 used LD-based clumping to select  $\approx 2000$  potentially important  
 SNPs. First, we sorted SNPs by p-value, removed SNPs with  
 p-values larger than 0.01, then used a greedy algorithm to select  
 the most-significant SNPs and mask all nearby SNPs (within  
 250Kb) with  $r^2 > 0.5$  (Purcell *et al.* 2007).

After the pre-selection stage, the records of focal and sec-  
 ondary traits from the remaining 649 individuals, which are  
 considered as an independent population, were analysed in  
 MegaBayesC using only the pre-selected potentially important  
 SNPs. The model specification of MegaBayesC was similar to  
 that used in the previous simulation study for independent pop-  
 ulation, except we set  $K = 30$ . In MegaBayesC, the total marker  
 effects of the focal trait were computed as:  $\alpha_f = \mathbf{B}_{2F}\lambda_f$ , where  
 $\mathbf{B}_{2F}$  is a  $b_{2F} \times K$  matrix of marker effects for latent factors,  
 with  $b_{2F}$  being the number of SNPs selected at the pre-selection  
 stage, and  $\lambda_f$  denotes the column of  $\Lambda$  that specifies the relationship  
 between factors and focal trait. Furthermore, to demonstrate  
 that the improved performance of MegaBayesC is attributed to  
 not only the use of the BayesC prior on the marker effects but  
 also the utilization of information from correlated secondary  
 traits, a ST-BayesC was also performed for the 649 individuals  
 at the second stage. MCMC chains of 50,000 iterations were run  
 for the BayesC-based methods with the first 10,000 iterations  
 discarded as burn-in.

In addition to the two-stage analysis, a one-stage ST-GCTA  
 was performed using the whole-genome SNP information and  
 the phenotypes of the focal trait from all 1003 individuals. To  
 compare with the two-stage analysis, the selection of potentially  
 important SNPs was done based on the one-stage ST-GCTA  
 result in the same manner as that in the pre-selection stage.

Figure 1 shows the procedures performed to estimate marker  
 effects in the three different methods. Simulations were repeated  
 100 times.

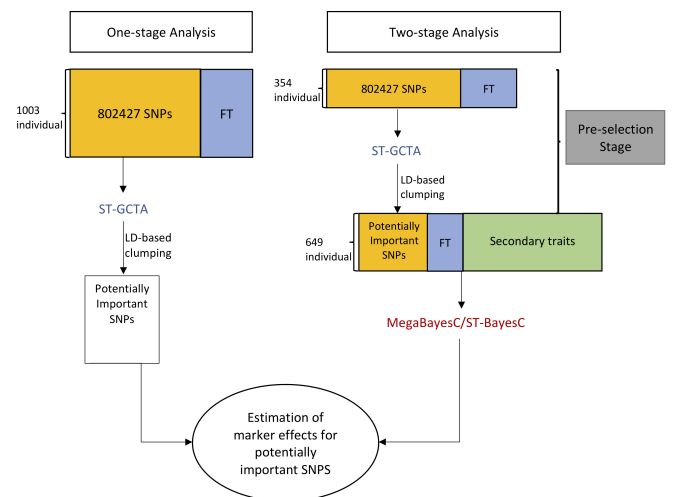

**Figure 1** Graphic representation for the procedure of one-stage and two-stage analyses performed for the estimation of marker effects. FT represents the focal trait, ST-GCTA represents single-trait GWAS implemented in GCTA, and ST-BayesC represents single-trait BayesC method. In ST-BayesC, only phenotypes of FT and genotypes of the pre-selected potentially important SNPs were used.

1 RMSEs of the QTL effect sizes and the percentage of variance  
2 in the focal trait explained by the QTL were used to evaluate the  
3 accuracy of estimation of QTL effects by different methods. The  
4 variance explained by marker  $l$  was computed as:  $var(\alpha_{lf}x_2)$ ,  
5 where  $\alpha_{lf}$  is the marker effect of SNP  $l$  on focal trait, and  $x_2$   
6 is the vector of genotypic covariates for SNP  $l$ . To score QTL  
7 accuracy, we parsed the detected QTL in three ways: 1) If the  
8 true QTL were selected in the set of potentially important SNPs  
9 (e.g., Stage 1), the estimated effects were compared directly to the  
10 true effects. 2) If a SNP in imperfect LD with the true QTL was  
11 selected instead of the true QTL, we flagged its estimated effect  
12 size in the accuracy comparison because the incomplete linkage  
13 and different allele frequencies of the two SNPs mean that the  
14 estimated effect size will not be directly comparable to that of  
15 the true QTL. However, the percentage of variance attributed  
16 to the marker should be similar to the true QTL as long as  $r^2$  is  
17 high; 3) If neither the true QTL nor any of its linked SNPs was  
18 selected in the potentially important SNPs, we set the estimated  
19 marker effect and variance explained by this QTL to 0. For the  
20 purpose of unit consistency, RMSE of estimated marker effects  
21 and estimated marker-explained standard deviation (i.e., square  
22 root of marker-explained variance) across different methods  
23 were compared. In this study, a SNP was considered to be  
24 linked to a QTL if the squared correlation between its genotypic  
25 covariate and the QTL genotype was greater than 0.4.

26 **Genetic Association Analysis of *Arabidopsis thaliana* Flowering Time and Gene Expression** Phenotypes of flowering time  
27 from 1003 accessions and expression data of 20843 genes from  
28 649 accessions were used, with flowering time selected as our  
29 focal trait. Gene expression data was downloaded from NCBI  
30 GEO (Barrett et al. 2012). Genes with average counts smaller  
31 than 10 were removed and the remaining gene counts were  
32 normalized and variance stabilized as per Runcie et al. (2021)  
33 using DESeq2 (Love et al. 2014). The two-stage MegaBayesC  
34 and one-stage ST-GCTA analyses described above were per-  
35 formed again on this dataset. LD-based clumping was done to  
36 select potentially important SNPs for both methods. The model  
37 specification of MegaBayesC was similar to that used in the  
38 Genomic Prediction section above. A MCMC chain of 80,000  
39 was run with the first 20,000 iterations discarded as burn-in. In  
40 the two-stage MegaBayesC analysis, potentially important SNPs  
41 with explained proportion of variance  $> 0.1\%$  were classified  
42 as significant SNPs, while in the one-stage ST-GCTA analysis,  
43 potentially important SNPs with  $p$ -value  $< 1 \times 10^{-5}$  were clas-  
44 sified as significant SNPs. We compared each significant SNP to  
45 a list of genes previously known to influence flowering time in  
46 *Arabidopsis* (Bouché et al. 2016), and counted as a match (i.e., a  
47 true positive hit) if a SNP was within  $\pm 100$  Kb distance from  
48 at least one of the reported genes. Otherwise the significant SNP  
49 was conservatively considered as a false positive association.

#### 51 Data availability

52 Scripts for running all analyses are archived at GitHub: <https://github.com/Jiayi-Qu/Mega-BayesC>. The Bayesian Alphabet im-  
53 plementation is available on the "BayesAlphabet" branch of  
54 the MegaLMM GitHub repository: <https://github.com/deruncie/MegaLMM/tree/BayesAlphabet>. Data from the wheat breeding  
55 trial were downloaded from CIMMYT Research Data (Krause  
56 et al. 2019). *Arabidopsis* flowering time data was downloaded  
57 from Arapheno: <https://arapheno.1001genomes.org/phenotype/261/>. Gene expression data was downloaded from NCBI GEO  
58 (Barrett et al. 2012). Genotype data were downloaded from the

1001 genomes project (Alonso-Blanco et al. 2016).

## 62 Results

### 63 MegaBayesC Improves Estimation of Genetic Values

64 We tested if MegaBayesianAlphabet models could match or  
65 exceed the performance of MegaLMM in trait-assisted ge-  
66 nomic prediction using data from a breeding trial of bread  
67 wheat. We compared the genomic value prediction accuracy of  
68 MegaBayesC and MegaRRBLUP to MegaGBLUP in this dataset,  
69 where we leveraged 620 hyperspectral phenotypes measured on  
70 1033 bread wheat lines to supplement genotype-based predic-  
71 tions of genomic value for grain yield. As a baseline, we per-  
72 formed conventional univariate GBLUP-based genomic value  
73 prediction as well. Prediction accuracy was assessed by cross-  
74 validation where for each of 20 replicates, grain yield values  
75 of 50% of the lines were masked and used as an independent  
76 testing set. Estimated genetic correlations between predicted  
77 and observed yields in the testing set were used as the cross-  
78 validation statistic.

79 As shown in Figure 2, univariate GBLUP achieved a pre-  
80 diction accuracy of 0.43 in this dataset. MegaGBLUP fitted to  
81 all traits in MegaLMM with a single random effect based on  
82 the genomic relationship matrix  $\mathbf{K}$  achieved an average predic-  
83 tion accuracy of 0.69. MegaRRBLUP fitted in MegaBayesianAl-  
84 phabet achieved an average prediction accuracy of 0.68. No  
85 significant difference was observed between MegaGBLUP and  
86 MegaRRBLUP. RR-BLUP and GBLUP are mathematically equiv-  
87 alent (Whittaker et al. 2000; Meuwissen et al. 2001; Habier et al.  
88 2007) models that account for the contributions of the genetic  
89 markers, but MegaGBLUP uses a horseshoe prior for the ele-  
90 ments of  $\mathbf{A}$  while MegaRRBLUP uses the BayesC prior for these  
91 parameters with fixed  $\pi = 0.9$ . MegaBayesC, with its BayesC  
92 prior on the marker effects, achieved an average accuracy of  
93 0.75, significantly higher than the other methods. These results  
94 show that the use of biologically meaningful prior on marker  
95 effects can further improve the genomic selection in breeding  
96 programs.

### 97 MegaBayesC improves Estimation of Marker Effects in Simulated Populations with Independent Markers

98 Next, we ran a set of simulations to evaluate the ability of  
99 MegaBayesC to identify and accurately estimate the effect sizes  
100 of genetic variants for a set of correlated traits under different ge-  
101 netic architectures. Specifically, we tested whether MegaBayesC  
102 improved the estimation of variant effect sizes of a single focal  
103 trait when phenotypes of other correlated traits (i.e., secondary  
104 traits) were provided.

105 Since the magnitude and causes (genetic vs. non-genetic) of  
106 the covariance structures among traits determine the usefulness  
107 of the secondary traits, we considered two covariance structures.  
108 In both cases, we began by simulating a set of latent factors par-  
109 tially controlled by genetic variation. In Scenario 1, the majority  
110 of variation in the focal trait was controlled by latent factors that  
111 were dominated by genetic variation. In Scenario 2, the majority  
112 of variation in the focal trait was controlled by latent factors  
113 dominated by non-genetic sources of variation. We compared  
114 the estimation of marker effects between ST-BayesC (which ig-  
115 nored all secondary traits) and MegaBayesC (which used all  
116 trait data at once). We scored the accuracy of each method by  
117 the RMSE of estimated marker effects. In both scenarios, as the  
118 genetic architecture increased in complexity (i.e., the number of  
119 QTL increased and the average size of each QTL decreased to  
120 121



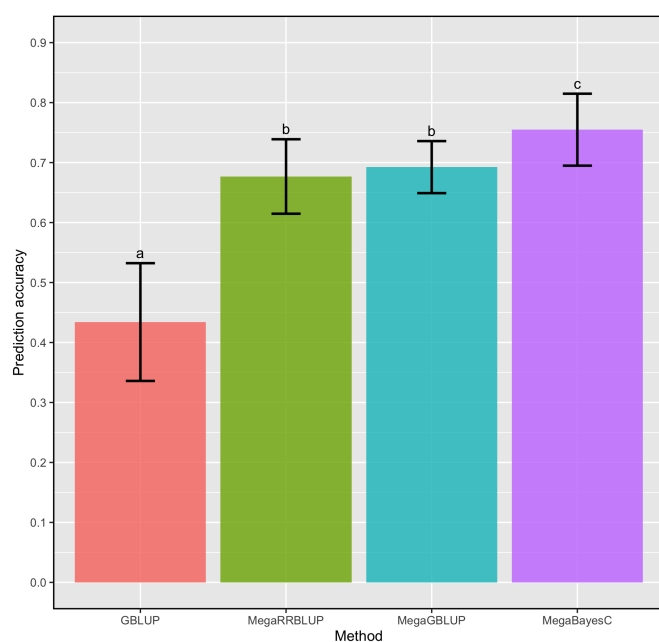

**Figure 2** Genomic value prediction performance of 4 models for wheat yield. Records of yield, 620 hyperspectral phenotypes, and genotype data for 1033 lines were available. 20 replicate validations were used. Bars show the mean prediction accuracy ( $\pm$  standard error) for each model, and letters show the statistical significance of mean difference between methods based on a paired t-test.

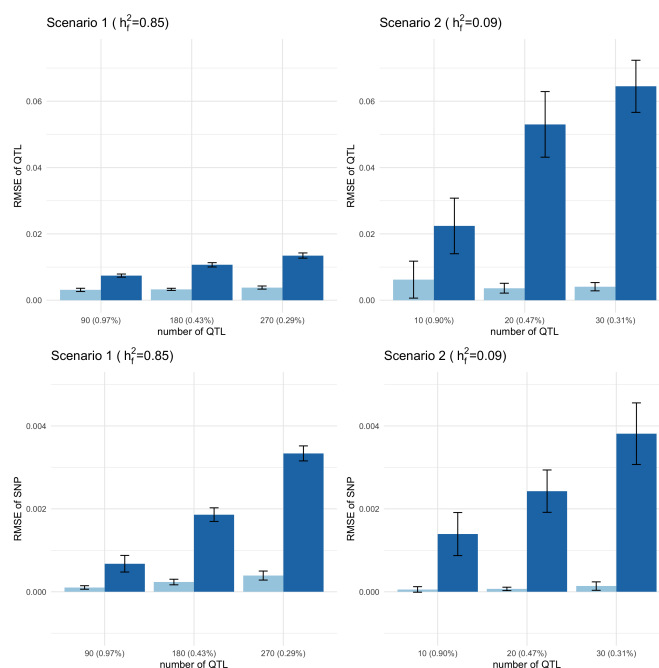

**Figure 3** Root mean square error (RMSE) of estimated QTL effects and SNP effects, respectively, under two scenarios. The upper panels show RMSE of estimated QTL effects under two scenarios. The lower panels show RMSE of estimated SNP effects under two scenarios. The left panels show RMSE for Scenario 1, where all latent factors had high heritability ( $h^2 = 0.95$ ). The right panels show RMSE for Scenario 2, where only one of the factors had high heritability (i.e., factor 1 had  $h^2 = 0.95$  and the remainder factors had  $h^2 = 0$ ). Results are shown for the simulation setting with  $n_{trait}/factor = 2$  and  $n_{factor} = 9$ . The average proportion of total variance explained by one QTL was shown in the parenthesis.

1 keep the total percentage of variation attributable to the QTL  
 2 constant), the performance of ST-BayesC decreased (RMSE in-  
 3 creased) much more dramatically than MegaBayesC. Figure 3  
 4 shows RMSE of estimated effects for QTL and SNP, respectively,  
 5 (i.e. QTL are markers with a non-zero effect and SNPs are markers  
 6 with a true effect size of zero) under the two scenarios for the  
 7 simulation setting where the largest difference of RMSE was ob-  
 8 served between MegaBayesC and ST-BayesC, with  $n_{trait}/factor$   
 9 = 2 and  $n_{factor} = 9$ . Results for other combinations of  $n_{factor}$ ,  
 10  $n_{trait}/factor$ , and  $n_{qtl}/factor$  are shown in Appendix (Figure 9).  
 11 In Scenario 1, the number of latent factors had no direct effect  
 12 on the performance of ST-BayesC beyond its effect on the num-  
 13 ber of QTL. Also, the number of traits linked to each factor  
 14 (i.e.  $n_{trait}/factor$ ) did not significantly affect the performance of  
 15 MegaBayesC in both Scenario 1 and Scenario 2. This shows the  
 16 ability of MegaBayesC to capture the underlying sources of cor-  
 17 relations among traits by optimizing the utilization of secondary  
 18 traits, even when each factor only has one linked secondary trait  
 19 included in the model.

20 For ST-BayesC, the RMSE of estimated marker effects in-  
 21 creased significantly as marker-explained variances decreased  
 22 in both scenarios. Compared to Scenario 1, the increase of RMSE  
 23 for estimated effects of QTL was greater in Scenario 2, while the  
 24 increase of RMSE for estimated effects of SNPs were similar be-  
 25 tween the two scenarios. This indicates that the performance of  
 26 ST-BayesC to identify QTL was affected by the marker-explained  
 27 variance as well as the variance structure of the focal trait.

28 In contrast, the performance of MegaBayesC was relatively  
 29 constant across scenarios as measured by RMSE. In terms of the  
 30 estimation of effect sizes of QTL, the influence of the variance

1 structure and the marker-explained variance was negligible,  
 2 which lead to a relatively constant RMSE across the simulation  
 3 settings. At the same time, MegaBayesC was able to shrink  
 4 most SNPs more effectively towards zero, especially in Scenario  
 5 2, when the ratio of number of QTL to number of SNPs was  
 6 smaller.

7 To further explore the differences in the performance of ST-  
 8 BayesC and MegaBayesC in Scenario 2, we plotted the estimated  
 9 marker effects under one example simulation with  $n_{factor} = 9$ ,  
 10  $n_{qtl}/factor = 30$ , and  $n_{trait} = 2$  (Figure 4).

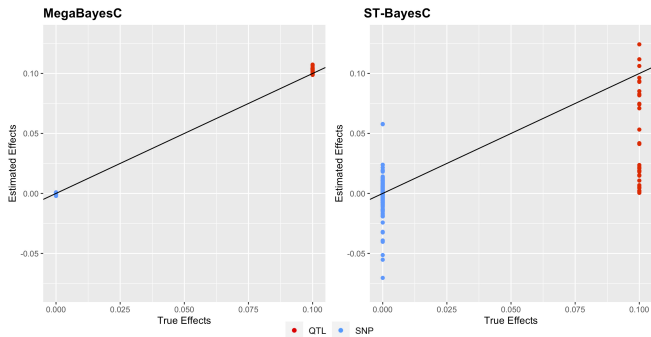

**Figure 4** Scatter plot of estimated marker effects versus true marker effects for the simulation setting with  $n_{factor} = 9$ ,  $n_{qtl}/factor = 30$ , and  $n_{trait} = 2$  in Scenario 2, where all factors have effects on the focal trait but only one of them is a genetic factor (i.e.,  $h^2 > 0$ ). Red and blue colors specify QTL (effect size  $\neq 0$ ) and SNP (effect size = 0), respectively. The solid black line represents the line  $y = x$ .

11 For ST-BayesC, some QTL were successfully selected by the  
 12 model and their effect sizes were accurately estimated close to  
 13 the true value of 0.1. However, for the majority of QTL, the  
 14 estimated marker effects were shrunk toward 0s. On the other  
 15 hand, ST-BayesC erroneously estimated effect sizes of SNPs with  
 16 true effect sizes of 0 from -0.07 to 0.06. In contrast, the marker  
 17 effects of QTL and null-effect SNPs were accurately estimated  
 18 by MegaBayesC (Figure 4).

#### 19 **Estimation of Explained Variance of Markers in a Population** 20 **Simulated Using Real Genotype Data**

21 To explore the ability of MegaBayesC to accurately identify QTL  
 22 and estimate their effect sizes in the presence of LD, we gener-  
 23 ated simulated phenotypes based on real genotypes from an  
 24 Arabidopsis population. We then ran association analyses using  
 25 three methods: The direct (i.e. one-stage) method, ST-GCTA,  
 26 that only uses the focal trait, and two two-stage methods: ST-  
 27 BayesC and MegaBayesC, which both rely on a pre-selection  
 28 stage to select a set of candidate SNPs using one partition of the  
 29 population, and then an assay stage where the effects of those  
 30 SNPs on the focal trait are modeled in the second partition of  
 31 the population. We compared the performance of the models  
 32 by the RMSE of estimated marker effects and marker-explained  
 33 variances.

34 Figure 5 shows the RMSE of estimated marker effects and  
 35 estimated marker-explained standard deviations from the simu-  
 36 lated phenotype data. The two-stage MegaBayesC method  
 37 achieved the lowest RMSE for both marker effects and marker-  
 38 explained standard deviations, followed by the two-stage analy-  
 39 sis incorporating ST-BayesC, and then the one-stage single-trait  
 40 GWAS (ST-GCTA). The RMSE of the one-stage single-trait GWAS

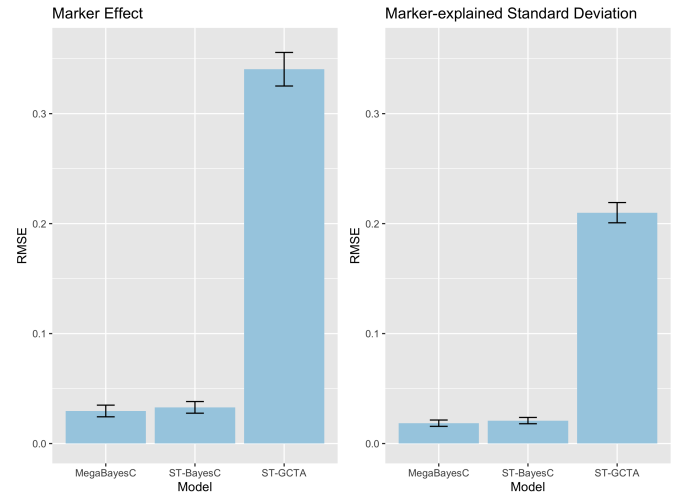

**Figure 5** Root mean square error (RMSE) of estimated marker effects and estimated marker-explained standard deviations (i.e., square root of marker-explained variances) across different methods. The performance of two-stage (ST-BayesC and MegaBayesC) methods and one-stage (ST-GCTA) method were compared.

was around ten times larger than that of the two-stage BayesC-  
 41 based analyses, while the difference between ST-BayesC and  
 42 MegaBayesC was much smaller. Furthermore, the RMSE of esti-  
 43 mated marker-explained standard deviations was generally  
 44 lower than that of estimated marker effects. The larger RMSE of  
 45 estimated marker effects is likely due to the selection of linked  
 46 SNPs rather than the true causal QTL in the pre-selection stage.  
 47

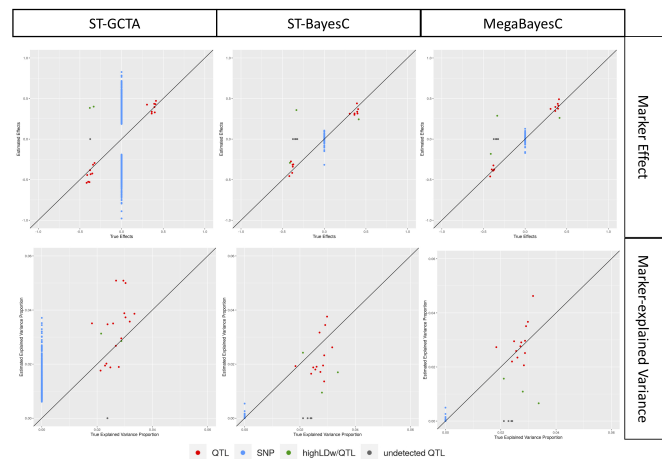

**Figure 6** The relationship between estimated and true values of marker effects and marker-explained proportion of variance for focal trait. Three different methods (ST-GCTA, ST-BayesC, and MegaBayesC) were compared. Details of each method are presented in **Materials and Methods**.

To further explore the difference in the performance of ST-  
 48 BayesC and MegaBayesC in this simulation scenario, we present  
 49 the relationship between true and estimated marker effects for  
 50 one replicate in Figure 6. In this simulation, 19/20 true causal  
 51 QTL were selected by ST-GCTA, and only 16 were selected in  
 52 the pre-selection stage for the two-stage methods, ST-BayesC  
 53



1 and MegaBayesC. In all these three cases, the effect sizes of these  
 2 selected QTL were accurately estimated. However, the effect  
 3 sizes of many null-effect SNPs were dramatically overestimated  
 4 by ST-GCTA, leading to an overall high false positive rate. In  
 5 contrast, although a few true causal QTL were missed in the pre-  
 6 selection stage, SNPs with null effects that were moved forward  
 7 into stage two were estimated to have very small effects by both  
 8 ST-BayesC and MegaBayesC.

9 Note that in some cases, SNPs that are in LD with true QTL  
 10 were selected instead of the causal QTL. When the linkage phase  
 11 was negative, the estimated effect sizes for linked SNPs have  
 12 the opposite sign, which increases the reported RMSE. However,  
 13 even in these cases, the proportion of variance explained by  
 14 these linked markers is close to the proportion that would have  
 15 been explained by the true QTL, so the effect of LD on the RMSE  
 16 of marker-explained variances is minimized.

17 **Identifying Candidate Genes for Flowering Time in *Arabidop-***  
 18 ***sis* using Gene Expression Data as Secondary Traits**

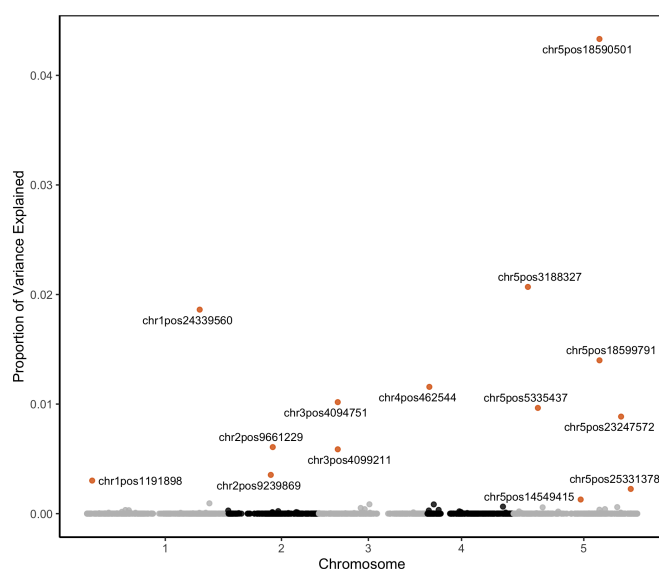

**Figure 7** Marker-explained proportion of variance for potentially important SNPs by the two-stage analysis using MegaBayesC. The top 14 SNPs that explained the greatest proportions of variance in flowering time are highlighted.

19 We applied the two-stage MegaBayesC and the one-stage  
 20 single-trait GWAS (ST-GCTA) to the task of identifying candi-  
 21 date genes that regulate flowering time in *Arabidopsis thaliana*  
 22 using actual flowering time measurements and genotype data  
 23 from 1003 *A. thaliana* accessions. In MegaBayesC, we included  
 24 the expression of 20843 genes measured on 649 of the accessions  
 25 as secondary traits.

26 Potentially important SNPs with marker-explained variance  
 27 greater than 0.1% in MegaBayesC and potentially important  
 28 SNPs with p-value smaller than  $10^{-5}$  in ST-GCTA were selected  
 29 as significant SNPs. MegaBayesC was better able to select a  
 30 limited number of candidate SNPs based on per-marker variance  
 31 explained (Figure 7) than ST-GCTA (Figure 8) by shrinking the  
 32 vast majority of SNP effects close to zero.

33 We assessed the accuracy of these associations by checking  
 34 whether known flowering time-related genes are located near  
 35 to the SNPs selected by each model. Using MegaBayesC, we

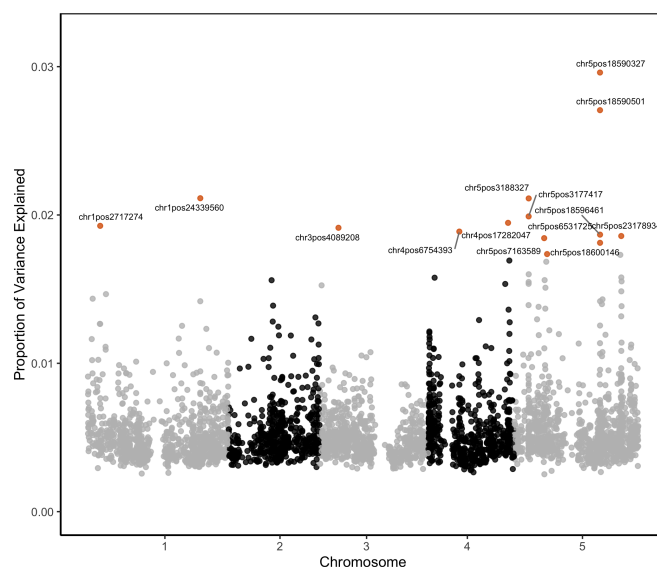

**Figure 8** Marker-explained proportion of variance for potentially important SNPs by the one-stage ST-GCTA analysis. The top 14 SNPs that explained the greatest proportions of variance in flowering time are highlighted.

36 selected 14 significant SNPs and 13 of these were located within  
 37 100Kb of known flowering time-related genes. Note that these  
 38 known genes were generally not the nearest gene to the signifi-  
 39 cant SNPs, but associations at this distance are not uncommon in  
 40 *Arabidopsis* (Sasaki *et al.* 2021). For ST-GCTA, we selected 34 sig-  
 41 nificant SNPs, among which 26 SNPs were located within 100Kb  
 42 of known flowering time-related genes. In total, based on our  
 43 prior knowledge, 14 and 15 genes were detected by MegaBayesC  
 44 and ST-GCTA, respectively. Detailed comparison on detected  
 45 genes between MegaBayesC and ST-GCTA is shown in Table 1.

| Method     | Number of Significant SNPs | Number of False Positives | Detected Genes                                                                                                                                             |
|------------|----------------------------|---------------------------|------------------------------------------------------------------------------------------------------------------------------------------------------------|
| MegaBayesC | 14                         | 1                         | AGL17, CRY2, <b>FLC</b> , <b>FT</b> , <b>FRL1</b> , GRP7, HDA6, NF-YC4, <b>PIE1</b> , SEF, VP, <b>VIN3</b> , <b>ZTL</b> , and <b>DOG1</b>                  |
| ST-GCTA    | 34                         | 8                         | CIB2, <b>FLC</b> , <b>FT</b> , <b>FRL1</b> , JMJ14, LATE, LIF2, MRG1, <b>AtNDX</b> , <b>PIE1</b> , PRMT4A, TSE, <b>VIN3</b> , <b>ZTL</b> , and <b>DOG1</b> |

**Table 1** Detailed information on detected genes from ST-GCTA and MegaBayesC. Bold fonts are used to indicate genes that are detected in both methods.

**Discussion**

46 The emergence of new types of phenotype data, such as gene  
 47 expression or spectral reflectances, has created a demand for  
 48 the development of robust models that are able to analyze large  
 49 numbers of phenotypes in genome-enabled analysis. Although  
 50 Bayesian regression models with mixture priors allow for more  
 51 biologically meaningful prior assumptions on the effect size dis-  
 52 tributions of causal variants, their corresponding multivariate  
 53 models (Cheng *et al.* 2018b) suffer from a high computational bur-  
 54 den. In this paper, we developed a Bayesian sparse factor model  
 55

1 with mixture priors on marker effects (MegaBayesianAlphabet)  
 2 to implement both genome-wide prediction and association for  
 3 analyses with hundreds to tens-of-thousands of phenotypes.  
 4 MegaBayesianAlphabet uses a moderate number of latent factors  
 5 ( $K$ ) to account for the covariance among the observed traits.  
 6 This substantially reduces the computational burden relative to  
 7 either a multivariate Bayesian regression model or a multivariate  
 8 linear mixed model with fully-parameterized trait covariance  
 9 matrices when the number of traits ( $t$ ) is large.

10 However, the sparse factor structure of MegaBayesianAlphabet  
 11 does not reduce the model complexity enough to enable  
 12 mixture priors over the millions of genetic markers that are  
 13 available in many systems from high-density genotyping arrays  
 14 or whole genome sequencing. When marker effects of the factors  
 15 and the trait-specific residuals are both included in the model,  
 16 the number of marker effects to be estimated is equivalent to  
 17  $(t + K) \times p$ , with  $t$  being the number of observed traits,  $K$  being  
 18 the number of factors, and  $p$  being the number of total SNPs,  
 19 which would require a tremendous amount of computational  
 20 time and memory storage for whole-genome analysis.

21 We therefore developed two approximations to greatly re-  
 22 duce the time complexity of the full model. First, we forced the  
 23 marker effects to affect the secondary traits through the  $K$  factors  
 24 (although we do allow marker effects to independently control  
 25 the focal trait). This reduces the number of marker effects to  
 26  $(K + 1)p$ . Second, we developed a two-stage approach to prune  
 27 the candidate markers before subjecting the pruned markers to  
 28 the MegaBayesC analysis. For our MegaBayesC analysis of the  
 29 *Arabidopsis* dataset with  $n = 649$ ,  $t = 20844$ , and  $p = 2804$ , it took  
 30 around 3 hours to sample a MCMC chain of 10,000 iterations on a  
 31 computer with 1 node and 20 CPU.

32 While MegaBayesC, and MegaBayesianAlphabet more gener-  
 33 ally, shows promise in its ability to integrate thousands of traits  
 34 in genome-wide prediction and association, the trade-off be-  
 35 tween the benefit of incorporating secondary traits and the com-  
 36 putational cost brought from the increased model complexity  
 37 must be considered. Based on our simulated study, MegaBayesC  
 38 can effectively disentangle the genetic and non-genetic sources  
 39 of covariation among observed traits. When there is an impor-  
 40 tant environmental component in the variation of focal trait,  
 41 and this environmental component is shared by many other  
 42 highly correlated traits, we expect MegaBayesianAlphabet mod-  
 43 els to provide a large benefit by providing a tool to effectively  
 44 control for this environmental variation. However, when the  
 45 secondary traits are not highly correlated with the focal trait,  
 46 or the heritability of the focal trait is already sufficiently high,  
 47 MegaBayesianAlphabet may prove less useful.

48 In this paper, we have focused on two versions of  
 49 MegaBayesianAlphabet: MegaBayesC with the BayesC prior  
 50 on the marker effects, and MegaRRBLUP with a ridge prior on  
 51 the marker effects. Implementing other mixture priors in the  
 52 MegaLMM R package is relatively straightforward, and we antic-  
 53 ipate that the BayesA, BayesB or BayesR priors may provide  
 54 benefits in specific datasets.

## 55 Appendix

### 56 Gibbs Sampler Updates

#### 57 Sample F given all other parameters

To sample  $\mathbf{F}$ , we transpose Eq. 1:

$$\mathbf{Y}^T = \mathbf{\Lambda}^T \mathbf{F}^T + \mathbf{M}_R^T + \mathbf{E}_R^T \quad (4)$$

where  $\mathbf{M}_R = \mathbf{X}_1 \mathbf{B}_1 + \mathbf{X}_{2R} \mathbf{B}_{2R}$ . Conditioning on  $\mathbf{B}_{2F}, \mathbf{B}_{2R}$ ,  
 columns of  $\mathbf{F}^T$  and  $\mathbf{M}_R^T$  are uncorrelated and we can represent  
 Eq. 4 as a set of simple linear regressions:

$$(\tilde{\mathbf{Y}}^T)_i = \tilde{\mathbf{\Lambda}}^T (\mathbf{F}^T)_i + (\tilde{\mathbf{M}}_R^T)_i + (\tilde{\mathbf{E}}_R^T)_i \quad (5)$$

$$(\mathbf{F}^T)_i \sim N(\boldsymbol{\mu}_{(\mathbf{F}^T)_i}, \mathbf{D}_f) \quad (6)$$

$$(\tilde{\mathbf{E}}_R^T)_i \sim N(\mathbf{0}, \mathbf{D}_{(\tilde{\mathbf{Y}}^T)_i}) \quad (7)$$

where  $\tilde{\cdot}$  denotes the removal of missing trait data from the cor-  
 responding entity. For example,  $(\tilde{\mathbf{Y}}^T)_i$  is the sub-vector of non-  
 missing traits in the  $i$ th row of  $\mathbf{Y}$ .  $(\mathbf{F}^T)_i$  denotes the  $i$ th row  
 of  $\mathbf{F}$ , which follows a multivariate normal distribution with  
 mean  $\boldsymbol{\mu}_{(\mathbf{F}^T)_i} = \mathbf{B}_{2F}^T (\mathbf{X}_{2F}^T)_i$  and (co)variance matrix  $\mathbf{D}_f = \boldsymbol{\Psi}_{FE}$ .  
 $\mathbf{D}_{(\tilde{\mathbf{Y}}^T)_i} = \tilde{\boldsymbol{\Psi}}_{RE} \cdot \boldsymbol{\Psi}_{FE}$  and  $\tilde{\boldsymbol{\Psi}}_{RE}$  are diagonal matrices.

Let  $(\tilde{\mathbf{Y}}_{cor}^T)_i = (\tilde{\mathbf{Y}}^T)_i - (\tilde{\mathbf{M}}_R^T)_i$ , we have

$$(\tilde{\mathbf{Y}}_{cor}^T)_i = \tilde{\mathbf{\Lambda}}^T (\mathbf{F}^T)_i + (\tilde{\mathbf{E}}_R^T)_i \quad (8)$$

For simplicity, let  $(\tilde{\mathbf{Y}}_{cor}^T)_i = \mathbf{y}_{cor_i}$ ,  $\tilde{\mathbf{\Lambda}}^T = \mathbf{\Lambda}^T$ ,  $(\mathbf{F}^T)_i = \mathbf{f}_i$ ,  
 $\boldsymbol{\mu}_{(\mathbf{F}^T)_i} = \boldsymbol{\mu}_{f_i}$  and  $\mathbf{D}_{(\tilde{\mathbf{Y}}^T)_i} = \mathbf{D}_Y$ . The full conditional posterior  
 distribution for  $(\mathbf{F}^T)_i$  is derived as:

$$\begin{aligned} f(\mathbf{f}_i | ELSE) &\propto f(\mathbf{y}_{cor_i} | \mathbf{\Lambda}^T, \mathbf{f}_i, \mathbf{D}_Y) f(\mathbf{f}_i | \boldsymbol{\mu}_{f_i}, \mathbf{D}_f) \\ &\propto \exp\left\{-\frac{1}{2}(\mathbf{y}_{cor_i} - \mathbf{\Lambda}^T \mathbf{f}_i)^T (\mathbf{D}_Y)^{-1} (\mathbf{y}_{cor_i} - \mathbf{\Lambda}^T \mathbf{f}_i)\right\} \\ &\times \exp\left\{-\frac{1}{2}(\mathbf{f}_i - \boldsymbol{\mu}_{f_i})^T (\mathbf{D}_f)^{-1} (\mathbf{f}_i - \boldsymbol{\mu}_{f_i})\right\} \\ &\propto \exp\left\{-\frac{1}{2}(\mathbf{f}_i^T (\mathbf{D}_f^{-1} + \mathbf{\Lambda} \mathbf{D}_Y^{-1} \mathbf{\Lambda}^T) \mathbf{f}_i - 2(\mathbf{y}_{cor_i}^T \mathbf{D}_Y^{-1} \mathbf{\Lambda}^T + \boldsymbol{\mu}_{f_i}^T \mathbf{D}_f^{-1}) \mathbf{f}_i)\right\} \\ &\propto \exp\left\{-\frac{1}{2}(\mathbf{f}_i^T \mathbf{C} \mathbf{f}_i - 2\mathbf{r}^T \mathbf{f}_i)\right\} \\ &\propto N(\mathbf{C}^{-1} \mathbf{r}, \mathbf{C}^{-1}) \end{aligned}$$

Therefore,  $(\mathbf{F}^T)_i | ELSE \sim N(\boldsymbol{\mu}, \boldsymbol{\Sigma})$  with

$$\boldsymbol{\Sigma} = \left[ \mathbf{D}_f^{-1} + \tilde{\mathbf{\Lambda}} \mathbf{D}_{(\tilde{\mathbf{Y}}^T)_i}^{-1} \tilde{\mathbf{\Lambda}}^T \right]^{-1} \quad (9)$$

$$\boldsymbol{\mu} = \boldsymbol{\Sigma} \left[ \tilde{\mathbf{\Lambda}} \mathbf{D}_{(\tilde{\mathbf{Y}}^T)_i}^{-1} (\tilde{\mathbf{Y}}_{cor}^T)_i + \mathbf{D}_f^{-1} \boldsymbol{\mu}_{(\mathbf{F}^T)_i} \right] \quad (10)$$

### Sample parameters in $\mathbf{\Lambda}$

**Full conditional posterior distribution of  $\mathbf{\Lambda}$**  The prior for  $\lambda_j$  is  
 specified as follows:

$$\lambda_{kj} = \begin{cases} N(0, \tau_k^{-1} \sigma_{R_j}^2) & \text{probability } (1 - \pi_k) \\ 0 & \text{probability } (\pi_k) \end{cases} \quad (11)$$

$$\sigma_{R_j}^2 \sim iG(a_\sigma, b_\sigma) \quad (12)$$

$$\tau_k = \prod_{h=1}^k \delta_h \quad (13)$$

$$\delta_1 = 1, \quad \delta_h \sim Ga(a_\delta, b_\delta) \quad h = 2 \dots k \quad (14)$$

This mixture prior for  $\lambda_j$  can be parameterized as:  $\mathbf{D}_{\gamma_j} \boldsymbol{\beta}_{\lambda_j}$ ,  
 where  $\mathbf{D}_{\gamma_j} = \text{Diag}(\boldsymbol{\gamma}_{\lambda_j})$  with

$$\boldsymbol{\gamma}_{\lambda_j(k)} = \begin{cases} 1 & \text{probability } (1 - \pi_{\Lambda_k}) \\ 0 & \text{probability } (\pi_{\Lambda_k}) \end{cases} \quad (15)$$

1 and  $\beta_{\lambda_j} \sim N(\mathbf{0}, \sigma_{R_j}^2 \mathbf{D}_\lambda = \sigma_{R_j}^2 \text{Diag}(\tau_k^{-1}))$  for  $k = 1, 2, \dots, K$ .

Conditional on  $\mathbf{F}$ , Eq. 1 can be simplified into  $t$  independent univariate linear mixed models for the columns of  $\mathbf{Y}$ . For the  $j$ th column of  $\mathbf{Y}$ :

$$2 \quad \mathbf{y}_j = \mathbf{X}_1 \mathbf{b}_{1j} + \mathbf{F} \mathbf{D}_{\gamma_j} \beta_{\lambda_j} + \mathbf{X}_{2R} \mathbf{b}_{2Rj} + \mathbf{e}_{R_j} \quad (16)$$

where  $\mathbf{e}_{R_j} \sim N(\mathbf{0}, \sigma_{R_j}^2 \mathbf{I})$ .

$$\begin{aligned} f(\beta_{\lambda_j} | ELSE) &\propto f(\mathbf{y}_j | \mathbf{b}_{1j}, \mathbf{F}, \mathbf{D}_{\gamma_j}, \beta_{\lambda_j}, \mathbf{b}_{2Rj}, \sigma_{R_j}^2) f(\beta_{\lambda_j} | \mathbf{D}_\lambda, \sigma_{R_j}^2) \\ &\propto \exp\left\{-\frac{1}{2\sigma_{R_j}^2} (\boldsymbol{\epsilon} - \mathbf{F} \mathbf{D}_{\gamma_j} \beta_{\lambda_j})^T (\boldsymbol{\epsilon} - \mathbf{F} \mathbf{D}_{\gamma_j} \beta_{\lambda_j})\right\} \times \exp\left\{-\frac{1}{2\sigma_{R_j}^2} \beta_{\lambda_j}^T \mathbf{D}_\lambda^{-1} \beta_{\lambda_j}\right\} \\ &\propto \exp\left\{-\frac{1}{2} \left[ \beta_{\lambda_j}^T \left( \frac{\mathbf{D}_{\gamma_j}^T \mathbf{F}^T \mathbf{F} \mathbf{D}_{\gamma_j}}{\sigma_{R_j}^2} + \frac{\mathbf{D}_\lambda^{-1}}{\sigma_{R_j}^2} \right) \beta_{\lambda_j} - 2 \frac{\boldsymbol{\epsilon}^T \mathbf{F} \mathbf{D}_{\gamma_j}}{\sigma_{R_j}^2} \beta_{\lambda_j} \right]\right\} \\ &\propto \exp\left\{-\frac{1}{2} (\beta_{\lambda_j}^T \mathbf{C} \beta_{\lambda_j} - 2\mathbf{r}^T \beta_{\lambda_j})\right\} \\ &\propto N(\mathbf{C}^{-1} \mathbf{r}, \mathbf{C}^{-1}) \end{aligned}$$

3 where  $\boldsymbol{\epsilon} = \mathbf{y}_j - \mathbf{X}_1 \mathbf{b}_{1j} - \mathbf{X}_{2R} \mathbf{b}_{2Rj}$ ,  $\mathbf{C} = \frac{\mathbf{D}_{\gamma_j}^T \mathbf{F}^T \mathbf{F} \mathbf{D}_{\gamma_j} + \mathbf{D}_\lambda^{-1}}{\sigma_{R_j}^2}$ , and  $\mathbf{r} =$

$$4 \quad \frac{\mathbf{D}_{\gamma_j}^T \mathbf{F}^T \boldsymbol{\epsilon}}{\sigma_{R_j}^2}.$$

5 Besides the full conditional posterior distribution for the mul-  
6 tivariate  $\beta_{\lambda_j}$  as derived above, a univariate version for the ele-  
7 ments in  $\beta_{\lambda_j}$  is also derived as follows to prepare for the deriva-  
8 tion of  $\gamma_{\lambda_{kj}}$ .

$$\begin{aligned} f(\beta_{\lambda_{kj}} | ELSE) &\propto f(\mathbf{y}_j | \mathbf{b}_{1j}, \mathbf{F}, \mathbf{D}_{\gamma_j}, \beta_{\lambda_j}, \mathbf{b}_{2Rj}, \sigma_{R_j}^2) f(\beta_{\lambda_{kj}} | \sigma_{R_j}^2, \tau_k) \\ &\propto \exp\left\{-\frac{1}{2\sigma_{R_j}^2} (\boldsymbol{\epsilon} - \sum_{i=1}^K \mathbf{F}_{\cdot i} \gamma_{\lambda_{ij}} \beta_{\lambda_{ij}})^T (\boldsymbol{\epsilon} - \sum_{i=1}^K \mathbf{F}_{\cdot i} \gamma_{\lambda_{ij}} \beta_{\lambda_{ij}})\right\} \times \exp\left\{-\frac{\tau_k \beta_{\lambda_{kj}}^2}{2\sigma_{R_j}^2}\right\} \\ &\propto \exp\left\{-\frac{1}{2\sigma_{R_j}^2} (\boldsymbol{\epsilon}^* - \mathbf{F}_{\cdot k} \gamma_{\lambda_{kj}} \beta_{\lambda_{kj}})^T (\boldsymbol{\epsilon}^* - \mathbf{F}_{\cdot k} \gamma_{\lambda_{kj}} \beta_{\lambda_{kj}})\right\} \times \exp\left\{-\frac{\tau_k \beta_{\lambda_{kj}}^2}{2\sigma_{R_j}^2}\right\} \\ &\propto \exp\left\{-\frac{1}{2} \left[ \left( \frac{\mathbf{F}_{\cdot k}^T \mathbf{F}_{\cdot k} \gamma_{\lambda_{kj}}}{\sigma_{R_j}^2} + \frac{\tau_k}{\sigma_{R_j}^2} \right) \beta_{\lambda_{kj}}^2 - 2 \frac{\boldsymbol{\epsilon}^{*T} \mathbf{F}_{\cdot k} \gamma_{\lambda_{kj}}}{\sigma_{R_j}^2} \beta_{\lambda_{kj}} \right]\right\} \\ &\propto \exp\left\{-\frac{1}{2} [A_{kj} \beta_{\lambda_{kj}}^2 - 2r \beta_{\lambda_{kj}}]\right\} \\ &\propto N(A_{kj}^{-1} r, A_{kj}^{-1}) \end{aligned}$$

9 where  $\boldsymbol{\epsilon}^* = \mathbf{y}_j - \mathbf{X}_1 \mathbf{b}_{1j} - \mathbf{X}_{2R} \mathbf{b}_{2Rj} - \sum_{i=1, i \neq k}^K \mathbf{F}_{\cdot i} \gamma_{\lambda_{ij}} \beta_{\lambda_{ij}}$ ,  $A_{kj} =$   
10  $\frac{\mathbf{F}_{\cdot k}^T \mathbf{F}_{\cdot k} \gamma_{\lambda_{kj}} + \tau_k}{\sigma_{R_j}^2}$ , and  $r = \frac{\boldsymbol{\epsilon}^{*T} \mathbf{F}_{\cdot k} \gamma_{\lambda_{kj}}}{\sigma_{R_j}^2}$ .

11 **Full conditional posterior distribution of  $\gamma_{\lambda_{kj}}$**  From the model  
12 specification,  $\gamma$  variables can take either 0 or 1. Let  $\boldsymbol{\theta}$  denote  
13 all other parameters except for  $\beta_{\lambda_{kj}}$  and  $\gamma_{\lambda_{kj}}$ , the marginal full  
14 conditional distribution of  $\gamma_{\lambda_{kj}}$  that integrates  $\beta_{\lambda_{kj}}$  is shown as:

$$f(\gamma_{\lambda_{kj}} | \boldsymbol{\theta}, \mathbf{y}) = \frac{f(\gamma_{\lambda_{kj}}, \boldsymbol{\theta}, \mathbf{y})}{\sum_{\gamma_{\lambda_{kj}}} f(\gamma_{\lambda_{kj}}, \boldsymbol{\theta}, \mathbf{y})} \quad (17)$$

$$= \frac{f(\mathbf{y} | \boldsymbol{\theta}, \gamma_{\lambda_{kj}}) f(\boldsymbol{\theta}) f(\gamma_{\lambda_{kj}} | \pi_{\Lambda_k})}{\sum_{\gamma_{\lambda_{kj}}} f(\mathbf{y} | \boldsymbol{\theta}, \gamma_{\lambda_{kj}}) f(\boldsymbol{\theta}) f(\gamma_{\lambda_{kj}} | \pi_{\Lambda_k})} \quad (18)$$

$$= \frac{f(\mathbf{y} | \boldsymbol{\theta}, \gamma_{\lambda_{kj}}) f(\gamma_{\lambda_{kj}} | \pi_{\Lambda_k})}{\sum_{\gamma_{\lambda_{kj}}} f(\mathbf{y} | \boldsymbol{\theta}, \gamma_{\lambda_{kj}}) f(\gamma_{\lambda_{kj}} | \pi_{\Lambda_k})} \quad (19)$$

Since  $f(\mathbf{y} | \boldsymbol{\theta}, \gamma_{\lambda_{kj}}) = \int f(\mathbf{y}, \beta_{\lambda_{kj}} | \boldsymbol{\theta}, \gamma_{\lambda_{kj}}) d\beta_{\lambda_{kj}}$ , the derivation  
for  $f(\mathbf{y} | \boldsymbol{\theta}, \gamma_{\lambda_{kj}})$  is shown as follows.

$$\begin{aligned} f(\mathbf{y} | \boldsymbol{\theta}, \gamma_{\lambda_{kj}}) &= \int f(\mathbf{y}, \beta_{\lambda_{kj}} | \boldsymbol{\theta}, \gamma_{\lambda_{kj}}) d\beta_{\lambda_{kj}} \\ &= \int f(\mathbf{y} | \beta_{\lambda_{kj}}, \boldsymbol{\theta}, \gamma_{\lambda_{kj}}) f(\beta_{\lambda_{kj}} | \sigma_{R_j}^2, \tau_k) d\beta_{\lambda_{kj}} \\ &\propto \int \exp\left\{-\frac{1}{2} \left[ \left( \frac{\mathbf{F}_{\cdot k}^T \mathbf{F}_{\cdot k} \gamma_{\lambda_{kj}} + \tau_k}{\sigma_{R_j}^2} \right) \beta_{\lambda_{kj}}^2 - 2 \frac{\boldsymbol{\epsilon}^{*T} \mathbf{F}_{\cdot k} \gamma_{\lambda_{kj}}}{\sigma_{R_j}^2} \beta_{\lambda_{kj}} \right]\right\} d\beta_{\lambda_{kj}} \\ &\quad \times \exp\left\{-\frac{\boldsymbol{\epsilon}^{*T} \boldsymbol{\epsilon}^*}{2\sigma_{R_j}^2}\right\} \\ &\propto \int \exp\left\{-\frac{1}{2} [A_{kj} \beta_{\lambda_{kj}}^2 - 2r \beta_{\lambda_{kj}} + r^2 A_{kj}^{-1}]\right\} d\beta_{\lambda_{kj}} \\ &\quad \times \exp\left\{-\frac{1}{2} \left( \frac{\boldsymbol{\epsilon}^{*T} \boldsymbol{\epsilon}^*}{\sigma_{R_j}^2} - r^2 A_{kj}^{-1} \right)\right\} \\ &\propto \exp\left\{-\frac{1}{2} \left( \frac{\boldsymbol{\epsilon}^{*T} \boldsymbol{\epsilon}^*}{\sigma_{R_j}^2} - r^2 A_{kj}^{-1} \right)\right\} \end{aligned}$$

where  $\boldsymbol{\epsilon}^* = \mathbf{y}_j - \mathbf{X}_1 \mathbf{b}_{1j} - \mathbf{X}_{2R} \mathbf{b}_{2Rj} - \sum_{i=1, i \neq k}^K \mathbf{F}_{\cdot i} \gamma_{\lambda_{ij}} \beta_{\lambda_{ij}}$ ,  $A_{kj} =$   
17  $\frac{\mathbf{F}_{\cdot k}^T \mathbf{F}_{\cdot k} \gamma_{\lambda_{kj}} + \tau_k}{\sigma_{R_j}^2}$ , and  $r = \frac{\boldsymbol{\epsilon}^{*T} \mathbf{F}_{\cdot k} \gamma_{\lambda_{kj}}}{\sigma_{R_j}^2}$ .  
18

Given Eq. 19, we have

$$\begin{aligned} f(\gamma_{\lambda_{kj}} = 0) &= \frac{f(\mathbf{y} | \boldsymbol{\theta}, \gamma_{\lambda_{kj}} = 0) f(\gamma_{\lambda_{kj}} = 0 | \pi_{\Lambda_k})}{\sum_{\gamma_{\lambda_{kj}}} f(\mathbf{y} | \boldsymbol{\theta}, \gamma_{\lambda_{kj}}) f(\gamma_{\lambda_{kj}} | \pi_{\Lambda_k})} \\ &= \frac{\pi_{\Lambda_k} \times \exp\left\{\frac{1}{2} r^2 A_{kj}^{-1}\right\}}{\sum_{\gamma_{\lambda_{kj}}} \pi_{\Lambda_k} \times \exp\left\{\frac{1}{2} r^2 A_{kj}^{-1}\right\}} \\ &= \frac{\pi_{\Lambda_k}}{\pi_{\Lambda_k} + (1 - \pi_{\Lambda_k}) \exp\left\{\frac{1}{2} \left( \frac{\boldsymbol{\epsilon}^{*T} \mathbf{F}_{\cdot k}}{\sigma_{R_j}^2} \right)^2 \left( \frac{\mathbf{F}_{\cdot k}^T \mathbf{F}_{\cdot k} + \tau_k}{\sigma_{R_j}^2} \right)^{-1}\right\}} \end{aligned}$$

**Full conditional posterior distribution of  $\delta_l$**  In order to sample  
 $\tau_k$ , we need to firstly sample  $\delta_l$  when  $K > 1$ . To derive the full  
conditional posterior distribution of  $\delta_l$ , vectorize  $\boldsymbol{\Lambda}$  as  $\boldsymbol{\lambda}$ . Then,  
we have

$$\boldsymbol{\lambda} = \begin{bmatrix} \lambda_1 \\ \dots \\ \lambda_t \end{bmatrix}_{Kt \times 1} \sim N(\mathbf{0}, \boldsymbol{\Sigma} = \begin{bmatrix} \tau_1^{-1} \sigma_{R_1}^2 & & & & \\ & \ddots & & & \\ & & \tau_K^{-1} \sigma_{R_t}^2 & & \\ & & & \tau_1^{-1} \sigma_{R_t}^2 & \\ & & & & \ddots \\ & & & & & \tau_K^{-1} \sigma_{R_t}^2 \end{bmatrix}_{Kt \times Kt})$$

Note that the determinant of a diagonal matrix is the product  
of elements of its diagonal.  
19  
20



$$\begin{aligned}
f(\delta_l|ELSE) &\propto f(\lambda|\Sigma)f(\delta_l|a_\delta, b_\delta) \\
&\propto \prod_{k=1}^K \prod_{j=1}^t [(\tau_k)^{-1 \times (-1/2)} \exp\{-\frac{1}{2} \frac{\lambda_{kj}^2}{\tau_k^{-1} \sigma_{R_j}^2}\}] \\
&\times (\delta_l)^{a_\delta - 1} \exp\{-b_\delta \delta_l\} \\
&\propto [\prod_{k=1}^K \prod_{j=1}^t (\delta_l)^{1/2}] \times \delta_l^{a_\delta - 1} \times \exp\{-\frac{1}{2} \sum_{k=1}^K \sum_{j=1}^t \frac{\lambda_{kj}^2 \tau_k}{\sigma_{R_j}^2}\} \exp\{-b_\delta \delta_l\} \\
&\propto [\prod_{k=1}^K \prod_{j=1}^t (\delta_l)^{1/2}] \times \delta_l^{a_\delta - 1} \times \exp\{-b_\delta \delta_l\} \\
&\times \exp\{-\frac{1}{2} \sum_{k=1}^K \sum_{j=1}^t \frac{\lambda_{kj}^2 (\prod_{h=1, h \neq l}^k \delta_h) \delta_l}{\sigma_{R_j}^2}\} \\
&\propto (\delta_l)^{\frac{t(K-l+1)}{2} + a_\delta - 1} \exp\{-b_\delta \delta_l\} \\
&\times \exp\{-\frac{1}{2} [\sum_{k=1}^K (\prod_{h=1, h \neq l}^k \delta_h) \sum_{j=1}^t \frac{\lambda_{kj}^2}{\sigma_{R_j}^2}] \delta_l\} \\
&\propto Ga(a_\delta + \frac{t(K-l+1)}{2}, b_\delta + \frac{1}{2} \sum_{k=1}^K (\prod_{h=1, h \neq l}^k \delta_h) \sum_{j=1}^t \frac{\lambda_{kj}^2}{\sigma_{R_j}^2})
\end{aligned}$$

### Parallel Model Setting

Given  $\mathbf{F}$  and  $\Lambda$ , although the design matrices may differ for columns of  $\mathbf{Y}$  and  $\mathbf{F}$ , the form of both sets of conditional model can be similarly expressed as:

$$\mathbf{y} = \mathbf{X}_1 \boldsymbol{\alpha} + \mathbf{X}_2 \mathbf{D}_\gamma \boldsymbol{\beta} + \mathbf{e} \quad (20)$$

where

$$\boldsymbol{\alpha} \sim N(\mathbf{0}, \infty) \quad (21)$$

$$\boldsymbol{\beta} \sim N(\mathbf{0}, \sigma_\beta^2 \mathbf{I}) \quad (22)$$

$$\mathbf{D}_\gamma = \text{Diag}(\boldsymbol{\gamma}) \quad (23)$$

$$\gamma_i = \begin{cases} 1 & \text{probability } (1 - \pi) \\ 0 & \text{probability } (\pi) \end{cases} \quad (24)$$

$$\mathbf{e} \sim N(\mathbf{0}, \sigma^2 \mathbf{I}) \quad (25)$$

$$\sigma^2 \sim iG(a_0, b_0) \quad (26)$$

$$\sigma_\beta^2 \sim iG(a_\beta, b_\beta) \quad (27)$$

Conditional on  $\mathbf{F}$  and  $\Lambda$ , Eq. 1 can be simplified into  $t$  independent univariate linear mixed models for the columns of  $\mathbf{Y}_{cor} = \mathbf{Y} - \mathbf{F}\Lambda$ :

$$\mathbf{y}_{cor_j} = \mathbf{X}_1 \mathbf{b}_{1_j} + \mathbf{X}_2 \mathbf{B} \boldsymbol{\beta}_{B2R_j} \circ \boldsymbol{\gamma}_{B2R_j} + \mathbf{e}_{R_j} \quad (28)$$

where

$$\mathbf{b}_{1_j} \sim N(\mathbf{0}, \infty \mathbf{I}) \quad (29)$$

$$\boldsymbol{\beta}_{B2R_j} \sim N(\mathbf{0}, \sigma_{B2R_j}^2 \mathbf{I}) \quad (30)$$

$$\boldsymbol{\gamma}_{B2R_j(i)} = \begin{cases} 1 & \text{probability } (1 - \pi_j) \\ 0 & \text{probability } (\pi_j) \end{cases} \quad (31)$$

$$\mathbf{e}_{R_j} \sim N(\mathbf{0}, \sigma_{R_j}^2 \mathbf{I}_n) \quad (32)$$

Besides the columns of  $\mathbf{Y}$ , the columns of  $\mathbf{F}$  (Eq. 2) can be similarly expressed into  $K$  independent univariate linear mixed models:

$$\mathbf{f}_k = \mathbf{X}_{2F} \boldsymbol{\beta}_{B2F_k} \circ \boldsymbol{\gamma}_{B2F_k} + \mathbf{e}_{F_k} \quad (33)$$

where

$$\boldsymbol{\beta}_{B2F_k} \sim N(\mathbf{0}, \sigma_{B2F_k}^2 \mathbf{I}) \quad (34)$$

$$\boldsymbol{\gamma}_{B2F_k(i)} = \begin{cases} 1 & \text{probability } (1 - \pi_{F_k}) \\ 0 & \text{probability } (\pi_{F_k}) \end{cases} \quad (35)$$

$$\mathbf{e}_{F_k} \sim N(\mathbf{0}, \sigma_{F_k}^2 \mathbf{I}_n) \quad (36)$$

$$(37)$$

Here, factor-specific and trait-specific prior on the marker exclusion probability ( $\pi_{F_k}$  and  $\pi_j$ ) and the variance of marker effects ( $\sigma_{B2F_k}^2$  and  $\sigma_{B2R_j}^2$ ) are used for each latent factor and observed trait. We can see that the columns of  $\mathbf{Y}$  and  $\mathbf{F}$  can be generally expressed by Eq. 20. That is, for columns of  $\mathbf{Y}$ ,  $\mathbf{y} = \mathbf{y}_{cor_j}$ ,  $\boldsymbol{\alpha} = \mathbf{b}_{1_j}$ ,  $\mathbf{D}_\gamma = \text{Diag}(\boldsymbol{\gamma}_{B2R_j})$ ,  $\boldsymbol{\beta} = \boldsymbol{\beta}_{B2R_j}$ ,  $\mathbf{e} = \mathbf{e}_{R_j}$ ,  $\sigma^2 = \sigma_{R_j}^2$ ,  $\sigma_\beta^2 = \sigma_{B2R_j}^2$ . Similarly, for columns of  $\mathbf{F}$ ,  $\mathbf{y} = \mathbf{f}_k$ ,  $\boldsymbol{\alpha}$  is empty,  $\mathbf{D}_\gamma = \text{Diag}(\boldsymbol{\gamma}_{B2F_k})$ ,  $\boldsymbol{\beta} = \boldsymbol{\beta}_{B2F_k}$ ,  $\mathbf{e} = \mathbf{e}_{F_k}$ ,  $\sigma^2 = \sigma_{F_k}^2$ ,  $\sigma_\beta^2 = \sigma_{B2F_k}^2$ . Furthermore, we defined the following term based on the notation in Eq. 20:

$$\mathbf{V}_\beta = \mathbf{X}_2 \mathbf{D}_\gamma \mathbf{X}_2^T \sigma_\beta^2 + \sigma^2 \mathbf{I}$$

**Full conditional posterior distribution of  $\boldsymbol{\alpha}$**  The conditional posterior distribution for  $\boldsymbol{\alpha}$  (i.e.,  $\mathbf{b}_{1_j}$ ) is derived as (integrating out  $\boldsymbol{\beta}$ ):

$$\begin{aligned}
f(\boldsymbol{\alpha}|\cdot) &\propto f(\mathbf{y}|\boldsymbol{\alpha}, \mathbf{V}_\beta) \\
&\propto \exp\{-\frac{1}{2} (\mathbf{y} - \mathbf{X}_1 \boldsymbol{\alpha})^T \mathbf{V}_\beta^{-1} (\mathbf{y} - \mathbf{X}_1 \boldsymbol{\alpha})\} \\
&\propto \exp\{-\frac{1}{2} (\boldsymbol{\alpha}^T \mathbf{X}_1^T \mathbf{V}_\beta^{-1} \mathbf{X}_1 \boldsymbol{\alpha} - 2\mathbf{y}^T \mathbf{V}_\beta^{-1} \mathbf{X}_1 \boldsymbol{\alpha})\} \\
&\propto \exp\{-\frac{1}{2} (\boldsymbol{\alpha}^T \mathbf{A}_\alpha \boldsymbol{\alpha} - 2\mathbf{r}^T \boldsymbol{\alpha})\} \\
&\propto N(\mathbf{A}_\alpha^{-1} \mathbf{r}, \mathbf{A}_\alpha^{-1})
\end{aligned}$$

where  $\mathbf{A}_\alpha = \mathbf{X}_1^T \mathbf{V}_\beta^{-1} \mathbf{X}_1$ ,  $\mathbf{r} = \mathbf{X}_1^T \mathbf{V}_\beta^{-1} \mathbf{y}$ . The dimension of  $\mathbf{A}_\alpha$  is  $a(b_1) \times a(b_1)$ , and the dimension of  $\mathbf{V}_\beta$  is  $n \times n$ .

**Full conditional posterior distribution of  $\sigma^2$**  The conditional posterior distribution for  $\sigma^2$  (i.e.,  $\sigma_{R_j}^2$  and  $\sigma_{F_k}^2$ ) is derived as:

$$\begin{aligned}
f(\sigma^2|\cdot) &\propto f(\mathbf{y}|\boldsymbol{\alpha}, \mathbf{D}_\gamma, \boldsymbol{\beta}, \sigma^2) f(\sigma^2|a_0, b_0) \\
&\propto (\sigma^2)^{-\frac{n}{2}} \exp\{-\frac{1}{2\sigma^2} (\mathbf{y} - \mathbf{X}_1 \boldsymbol{\alpha} - \mathbf{X}_2 \mathbf{D}_\gamma \boldsymbol{\beta})^T (\mathbf{y} - \mathbf{X}_1 \boldsymbol{\alpha} - \mathbf{X}_2 \mathbf{D}_\gamma \boldsymbol{\beta})\} \\
&\times (\sigma^2)^{-a_0 - 1} \exp\{-\frac{b_0}{\sigma^2}\} \\
&\propto (\sigma^2)^{-(\frac{n}{2} + a_0) - 1} \exp\{-\frac{\boldsymbol{\epsilon}^T \boldsymbol{\epsilon} / 2}{\sigma^2}\} \exp\{-\frac{b_0}{\sigma^2}\} \\
&\propto iG(\frac{n}{2} + a_0, \frac{\boldsymbol{\epsilon}^T \boldsymbol{\epsilon}}{2} + b_0)
\end{aligned}$$

where  $\boldsymbol{\epsilon} = \mathbf{y} - \mathbf{X}_1 \boldsymbol{\alpha} - \mathbf{X}_2 \mathbf{D}_\gamma \boldsymbol{\beta}$ .

1 **Full conditional posterior distribution of  $\beta$**  The conditional pos-  
 2 terior distribution for  $\beta$  is derived as:

$$\begin{aligned} f(\beta|\cdot) &\propto f(\mathbf{y}|\boldsymbol{\alpha}, \mathbf{D}_\gamma, \beta, \sigma^2) f(\beta|\sigma_\beta^2) \\ &\propto \exp\left\{-\frac{1}{2\sigma^2}(\mathbf{y} - \mathbf{X}_1\boldsymbol{\alpha} - \mathbf{X}_2\mathbf{D}_\gamma\beta)^T(\mathbf{y} - \mathbf{X}_1\boldsymbol{\alpha} - \mathbf{X}_2\mathbf{D}_\gamma\beta)\right\} \\ &\times \exp\left\{-\frac{1}{2\sigma_\beta^2}\beta^T\beta\right\} \\ &\propto \exp\left\{-\frac{1}{2\sigma^2}(\boldsymbol{\epsilon} - \mathbf{X}_2\mathbf{D}_\gamma\beta)^T(\boldsymbol{\epsilon} - \mathbf{X}_2\mathbf{D}_\gamma\beta)\right\} \times \exp\left\{-\frac{1}{2\sigma_\beta^2}\beta^T\beta\right\} \\ &\propto \exp\left\{-\frac{1}{2}\left(\beta^T\left(\frac{\mathbf{D}_\gamma^T\mathbf{X}_2^T\mathbf{X}_2\mathbf{D}_\gamma}{\sigma^2} + \frac{1}{\sigma_\beta^2}\mathbf{I}\right)\beta - 2\frac{\boldsymbol{\epsilon}^T\mathbf{X}_2\mathbf{D}_\gamma}{\sigma^2}\beta\right)\right\} \\ &\propto \exp\left\{-\frac{1}{2}(\beta^T\mathbf{A}_\beta\beta - 2\mathbf{r}^T\beta)\right\} \\ &\propto N(\mathbf{A}_\beta^{-1}\mathbf{r}, \mathbf{A}_\beta^{-1}) \end{aligned}$$

3 where  $\mathbf{A}_\beta = \frac{\mathbf{D}_\gamma^T\mathbf{X}_2^T\mathbf{X}_2\mathbf{D}_\gamma}{\sigma^2} + \frac{1}{\sigma_\beta^2}\mathbf{I}$ ,  $\mathbf{r} = \frac{\mathbf{D}_\gamma^T\mathbf{X}_2^T\boldsymbol{\epsilon}}{\sigma^2}$ . The dimension  
 4 of  $\mathbf{A}_\beta$  is  $b \times b$ . For columns of  $\mathbf{Y}$ ,  $b = b_{2R}$ ,  $\boldsymbol{\epsilon} = \mathbf{y}_{corj} - \mathbf{X}_1\mathbf{b}_{1j}$ .  
 5 For columns of  $\mathbf{F}$ ,  $b = b_{2F}$ ,  $\boldsymbol{\epsilon} = \mathbf{f}_k$ . Besides the full conditional  
 6 posterior distribution of the multivariate  $\beta$  as derived above,  
 7 a univariate version for the elements  $\beta_l$  in  $\beta$  is also written as  
 8 follows.

$$\begin{aligned} f(\beta_l|\cdot) &\propto f(\mathbf{y}|\boldsymbol{\alpha}, \mathbf{D}_\gamma, \beta, \sigma^2) f(\beta_l|\sigma_\beta^2) \\ &\propto \exp\left\{-\frac{1}{2\sigma^2}(\mathbf{y} - \mathbf{X}_1\boldsymbol{\alpha} - \sum_{i=1}^b \mathbf{X}_{2:i}\gamma_i\beta_i)^T(\mathbf{y} - \mathbf{X}_1\boldsymbol{\alpha} - \sum_{i=1}^b \mathbf{X}_{2:i}\gamma_i\beta_i)\right\} \\ &\times \exp\left\{-\frac{\beta_l^2}{2\sigma_\beta^2}\right\} \\ &\propto \exp\left\{-\frac{1}{2\sigma^2}(\boldsymbol{\epsilon} - \mathbf{X}_{2:l}\gamma_l\beta_l)^T(\boldsymbol{\epsilon} - \mathbf{X}_{2:l}\gamma_l\beta_l)\right\} \exp\left\{-\frac{\beta_l^2}{2\sigma_\beta^2}\right\} \\ &\propto \exp\left\{-\frac{1}{2}\left[\left(\frac{\mathbf{X}_{2:l}^T\mathbf{X}_{2:l}\gamma_l}{\sigma^2} + \frac{1}{\sigma_\beta^2}\right)\beta_l^2 - 2\frac{\boldsymbol{\epsilon}^T\mathbf{X}_{2:l}\gamma_l}{\sigma^2}\beta_l\right]\right\} \\ &\propto \exp\left\{-\frac{1}{2}(A_\beta\beta_l^2 - 2r\beta_l)\right\} \\ &\propto N(A_\beta^{-1}r, A_\beta^{-1}) \end{aligned}$$

9 where  $\boldsymbol{\epsilon} = \mathbf{y} - \mathbf{X}_1\boldsymbol{\alpha} - \sum_{i=1, i \neq l}^b \mathbf{X}_{2:i}\gamma_i\beta_i$ ,  $A_\beta = \frac{\mathbf{X}_{2:l}^T\mathbf{X}_{2:l}\gamma_l}{\sigma^2} + \frac{1}{\sigma_\beta^2}$ ,  
 10  $r = \frac{\boldsymbol{\epsilon}^T\mathbf{X}_{2:l}\gamma_l}{\sigma^2}$ .

11 **Full conditional posterior distribution of  $\gamma_l$**  Let  $\boldsymbol{\theta}$  denote all  
 12 other parameters except for  $\beta_l$  and  $\gamma_l$ , the marginal full con-  
 13 ditional distribution of  $\gamma_l$  that integrates out  $\beta_l$  is shown as:

$$f(\gamma_l|\boldsymbol{\theta}, \mathbf{y}) = \frac{f(\gamma_l, \boldsymbol{\theta}, \mathbf{y})}{\sum_{\gamma_l} f(\gamma_l, \boldsymbol{\theta}, \mathbf{y})} \quad (38)$$

$$= \frac{f(\mathbf{y}|\boldsymbol{\theta}, \gamma_l) f(\boldsymbol{\theta}) f(\gamma_l|\pi)}{\sum_{\gamma_l} f(\mathbf{y}|\boldsymbol{\theta}, \gamma_l) f(\boldsymbol{\theta}) f(\gamma_l|\pi)} \quad (39)$$

$$= \frac{f(\mathbf{y}|\boldsymbol{\theta}, \gamma_l) f(\gamma_l|\pi)}{\sum_{\gamma_l} f(\mathbf{y}|\boldsymbol{\theta}, \gamma_l) f(\gamma_l|\pi)} \quad (40)$$

14 Since  $f(\mathbf{y}|\boldsymbol{\theta}, \gamma_l) = \int f(\mathbf{y}, \beta_l|\boldsymbol{\theta}, \gamma_l) d\beta_l$ , the derivation for  
 15  $f(\mathbf{y}|\boldsymbol{\theta}, \gamma_l)$  is shown as follows.

$$\begin{aligned} f(\mathbf{y}|\boldsymbol{\theta}, \gamma_l) &= \int f(\mathbf{y}, \beta_l|\boldsymbol{\theta}, \gamma_l) d\beta_l \\ &= \int f(\mathbf{y}|\beta_l, \boldsymbol{\theta}, \gamma_l) f(\beta_l|\sigma_\beta^2) d\beta_l \\ &\propto \int \exp\left\{-\frac{1}{2\sigma^2}(\boldsymbol{\epsilon} - \mathbf{X}_{2:l}\gamma_l\beta_l)^T(\boldsymbol{\epsilon} - \mathbf{X}_{2:l}\gamma_l\beta_l)\right\} \exp\left\{-\frac{\beta_l^2}{2\sigma_\beta^2}\right\} d\beta_l \\ &\propto \int \exp\left\{-\frac{1}{2}\left[\left(\frac{\mathbf{X}_{2:l}^T\mathbf{X}_{2:l}\gamma_l}{\sigma^2} + \frac{1}{\sigma_\beta^2}\right)\beta_l^2 - 2\frac{\boldsymbol{\epsilon}^T\mathbf{X}_{2:l}\gamma_l}{\sigma^2}\beta_l\right]\right\} d\beta_l \\ &\times \exp\left\{-\frac{1}{2\sigma^2}\boldsymbol{\epsilon}^T\boldsymbol{\epsilon}\right\} \\ &\propto \int \exp\left\{-\frac{1}{2}(A_\beta\beta_l^2 - 2r\beta_l + r^2A_\beta^{-1})\right\} d\beta_l \\ &\times \exp\left\{-\frac{1}{2}(\boldsymbol{\epsilon}^T\boldsymbol{\epsilon}/\sigma^2 - r^2A_\beta^{-1})\right\} \\ &\propto \exp\left\{-\frac{1}{2}(\boldsymbol{\epsilon}^T\boldsymbol{\epsilon}/\sigma^2 - r^2A_\beta^{-1})\right\} \end{aligned}$$

where  $\boldsymbol{\epsilon} = \mathbf{y} - \mathbf{X}_1\boldsymbol{\alpha} - \sum_{i=1, i \neq l}^b \mathbf{X}_{2:i}\gamma_i\beta_i$ ,  $A_\beta = \frac{\mathbf{X}_{2:l}^T\mathbf{X}_{2:l}\gamma_l}{\sigma^2} + \frac{1}{\sigma_\beta^2}$ ,  
 16  $r = \frac{\boldsymbol{\epsilon}^T\mathbf{X}_{2:l}\gamma_l}{\sigma^2}$ .  
 17

Given Eq. 40, we have

$$\begin{aligned} f(\gamma_l = 0) &= \frac{\pi \times \exp\left\{\frac{1}{2}r^2A_\beta^{-1}\right\}}{\sum_{\gamma_l} \pi_{\gamma_l} \times \exp\left\{\frac{1}{2}r^2A_\beta^{-1}\right\}} \\ &= \frac{\pi}{\pi + (1 - \pi) \exp\left\{\frac{1}{2}\left(\frac{\boldsymbol{\epsilon}^T\mathbf{X}_{2:l}}{\sigma^2}\right)^2 \left(\frac{\mathbf{X}_{2:l}^T\mathbf{X}_{2:l}}{\sigma^2} + \frac{1}{\sigma_\beta^2}\right)^{-1}\right\}} \\ f(\gamma_l = 1) &= \frac{(1 - \pi) \times \exp\left\{\frac{1}{2}r^2A_\beta^{-1}\right\}}{\sum_{\gamma_l} \pi_{\gamma_l} \times \exp\left\{\frac{1}{2}r^2A_\beta^{-1}\right\}} \\ &= \frac{(1 - \pi) \times \exp\left\{\frac{1}{2}\left(\frac{\boldsymbol{\epsilon}^T\mathbf{X}_{2:l}}{\sigma^2}\right)^2 \left(\frac{\mathbf{X}_{2:l}^T\mathbf{X}_{2:l}}{\sigma^2} + \frac{1}{\sigma_\beta^2}\right)^{-1}\right\}}{\pi + (1 - \pi) \exp\left\{\frac{1}{2}\left(\frac{\boldsymbol{\epsilon}^T\mathbf{X}_{2:l}}{\sigma^2}\right)^2 \left(\frac{\mathbf{X}_{2:l}^T\mathbf{X}_{2:l}}{\sigma^2} + \frac{1}{\sigma_\beta^2}\right)^{-1}\right\}} \end{aligned}$$

**Full conditional posterior distribution of  $\sigma_\beta^2$**

$$\begin{aligned} f(\sigma_\beta^2) &\propto f(\beta|\sigma_\beta^2) f(\sigma_\beta^2|a_\beta, b_\beta) \\ &\propto (\sigma_\beta^2)^{-\frac{b}{2}} \exp\left\{-\frac{1}{2\sigma_\beta^2}\beta^T\beta\right\} \times (\sigma_\beta^2)^{-a_\beta-1} \exp\left\{-\frac{b_\beta}{\sigma_\beta^2}\right\} \\ &\propto (\sigma_\beta^2)^{-\frac{b}{2}-a_\beta-1} \exp\left\{-\frac{1}{\sigma_\beta^2}\left(\frac{\beta^T\beta}{2} + b_\beta\right)\right\} \\ &\propto iG\left(\frac{b}{2} + a_\beta, \frac{\beta^T\beta}{2} + b_\beta\right) \end{aligned}$$

**Specification of parameters for the real data analysis per-  
 18 formed in the paper**  
 19

| Model (Analysis)  | K   | Chain Length | Burn-in |
|-------------------|-----|--------------|---------|
| MegaBayesC (GP)   | 100 | 10K          | 2K      |
| MegaGBLUP (GP)    | 100 | 10K          | 2K      |
| MegaRRBLUP (GP)   | 100 | 10K          | 2K      |
| MegaBayesC (GWAS) | 100 | 80K          | 20K     |

## 1 Supplementary Plots

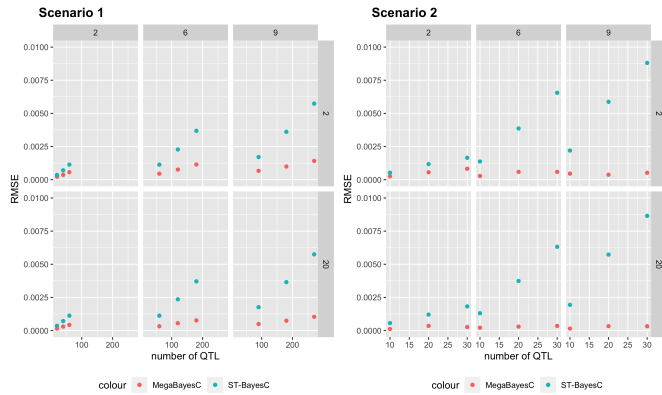

**Figure 9** RMSE of estimated marker effects under two scenarios for the total 36 different simulation settings. The performance of single-trait BayesC and MegaBayesC were compared. The performance of models for the simulation setting with  $n_{trait} = 2$  and 20 are presented at the first and second row, respectively. The performance of models for the simulation setting with  $n_{factor} = 2, 6, 9$  are presented at the first, second, and third column, respectively.



## Literature Cited

- Alonso-Blanco, C., J. Andrade, C. Becker, F. Bemm, J. Bergelson, *et al.*, 2016 1,135 genomes reveal the global pattern of polymorphism in *Arabidopsis thaliana*. *Cell* **166**: 481–491.
- Araus, J. L., S. C. Kefauver, M. Zaman-Allah, M. S. Olsen, and J. E. Cairns, 2018 Translating high-throughput phenotyping into genetic gain. *Trends in plant science* **23**: 451–466.
- Barrett, T., S. E. Wilhite, P. Ledoux, C. Evangelista, I. F. Kim, *et al.*, 2012 Ncbi geo: archive for functional genomics data sets—update. *Nucleic acids research* **41**: D991–D995.
- Bhattacharya, A. and D. B. Dunson, 2011 Sparse bayesian infinite factor models. *Biometrika* pp. 291–306.
- Bouché, F., G. Lobet, P. Tocquin, and C. Périlleux, 2016 Florid: an interactive database of flowering-time gene networks in *Arabidopsis thaliana*. *Nucleic Acids Research* **44**: D1167–D1171.
- Carvalho, C. M., J. Chang, J. E. Lucas, J. R. Nevins, Q. Wang, *et al.*, 2008 High-dimensional sparse factor modeling: applications in gene expression genomics. *Journal of the American Statistical Association* **103**: 1438–1456.
- Cheng, H., R. Fernando, and D. Garrick, 2018a Jwas: Julia implementation of whole-genome analysis software. In *Proceedings of the world congress on genetics applied to livestock production*, volume 11, p. 859.
- Cheng, H., K. Kizilkaya, J. Zeng, D. Garrick, and R. Fernando, 2018b Genomic Prediction from Multiple-Trait Bayesian Regression Methods Using Mixture Priors. *Genetics* **209**: genetics.300650.2018.
- Cheng, H., L. Qu, D. J. Garrick, and R. L. Fernando, 2015 A fast and efficient Gibbs sampler for BayesB in whole-genome analyses. *Genet Sel Evol* **47**: 80.
- Daetwyler, H. D., M. P. Calus, R. Pong-Wong, G. de Los Campos, and J. M. Hickey, 2013 Genomic prediction in animals and plants: simulation of data, validation, reporting, and benchmarking. *Genetics* **193**: 347–365.
- Erbe, M., B. Hayes, L. Matukumalli, S. Goswami, P. Bowman, *et al.*, 2012 Improving accuracy of genomic predictions within and between dairy cattle breeds with imputed high-density single nucleotide polymorphism panels. *Journal of dairy science* **95**: 4114–4129.
- Gibson, G. and B. Weir, 2005 The quantitative genetics of transcription. *TRENDS in Genetics* **21**: 616–623.
- Gilmour, A., R. Thompson, and B. Cullis, 1995 Linear mixed models algorithm for average information reml: an efficient in linear mixed models variance parameter estimation. *Biometrics* **51**: 1440–1450.
- Habier, D., R. L. Fernando, and J. C. Dekkers, 2007 The impact of genetic relationship information on genome-assisted breeding values. *Genetics* **177**: 2389–2397.
- Habier, D., R. L. Fernando, K. Kizilkaya, and D. J. Garrick, 2011 Extension of the bayesian alphabet for genomic selection. *BMC bioinformatics* **12**: 1–12.
- Henderson, C. and R. Quaas, 1976 Multiple trait evaluation using relatives' records. *Journal of Animal Science* **43**: 1188–1197.
- Kizilkaya, K., R. Fernando, and D. Garrick, 2010 Genomic prediction of simulated multibreed and purebred performance using observed fifty thousand single nucleotide polymorphism genotypes. *Journal of animal science* **88**: 544–551.
- Krause, M. R., L. González-Pérez, J. Crossa, P. Pérez-Rodríguez, O. Montesinos-López, *et al.*, 2019 Hyperspectral reflectance-derived relationship matrices for genomic prediction of grain yield in wheat. *G3: Genes, Genomes, Genetics* **9**: 1231–1247.
- Love, M. I., W. Huber, and S. Anders, 2014 Moderated estimation of fold change and dispersion for rna-seq data with *deseq2*. *Genome biology* **15**: 1–21.
- McGraw, E. A., Y. H. Ye, B. Foley, S. F. Chenoweth, M. Higgie, *et al.*, 2011 High-dimensional variance partitioning reveals the modular genetic basis of adaptive divergence in gene expression during reproductive character displacement. *Evolution: International Journal of Organic Evolution* **65**: 3126–3137.
- Mehrban, H., D. H. Lee, M. H. Moradi, C. IlCho, M. Naserkheil, *et al.*, 2017 Predictive performance of genomic selection methods for carcass traits in hanwoo beef cattle: impacts of the genetic architecture. *Genetics Selection Evolution* **49**: 1–13.
- Meuwissen, T. H., B. J. Hayes, and M. E. Goddard, 2001 Prediction of total genetic value using genome-wide dense marker maps. *Genetics* **157**: 1819–1829.
- Moser, G., S. H. Lee, B. J. Hayes, M. E. Goddard, N. R. Wray, *et al.*, 2015 Simultaneous Discovery, Estimation and Prediction Analysis of Complex Traits Using a Bayesian Mixture Model. *PLOS Genetics* **11**: e1004969.
- Park, T. and G. Casella, 2008 The bayesian lasso. *Journal of the American Statistical Association* **103**: 681–686.
- Poland, J., J. Endelman, J. Dawson, J. Rutkoski, S. Wu, *et al.*, 2012 Genomic selection in wheat breeding using genotyping-by-sequencing. *The Plant Genome* **5**: 103–113.
- Purcell, S., B. Neale, K. Todd-Brown, L. Thomas, M. A. Ferreira, *et al.*, 2007 Plink: a tool set for whole-genome association and population-based linkage analyses. *The American journal of human genetics* **81**: 559–575.
- Runcie, D. and H. Cheng, 2019 Pitfalls and remedies for cross validation with multi-trait genomic prediction methods. *G3: Genes, Genomes, Genetics* **9**: 3727–3741.
- Runcie, D. E. and S. Mukherjee, 2013 Dissecting high-dimensional phenotypes with bayesian sparse factor analysis of genetic covariance matrices. *Genetics* **194**: 753–767.
- Runcie, D. E., J. Qu, H. Cheng, and L. Crawford, 2021 Megalmm: Mega-scale linear mixed models for genomic predictions with thousands of traits. *Genome Biology* **22**: 1–25.
- Rutkoski, J., J. Poland, S. Mondal, E. Autrique, L. G. Pérez, *et al.*, 2016 Canopy temperature and vegetation indices from high-throughput phenotyping improve accuracy of pedigree and genomic selection for grain yield in wheat. *G3: Genes, Genomes, Genetics* **6**: 2799–2808.
- Sasaki, E., T. Köcher, D. L. Filiault, and M. Nordborg, 2021 Revisiting a gwas peak in *Arabidopsis thaliana* reveals possible confounding by genetic heterogeneity. *Heredity* **127**: 245–252.
- VanRaden, P. M., 2008 Efficient methods to compute genomic predictions. *Journal of dairy science* **91**: 4414–4423.
- Visscher, P. M., N. R. Wray, Q. Zhang, P. Sklar, M. I. McCarthy, *et al.*, 2017 10 years of gwas discovery: biology, function, and translation. *The American Journal of Human Genetics* **101**: 5–22.
- Wang, Z., D. Chapman, G. Morota, and H. Cheng, 2020 A multiple-trait bayesian variable selection regression method for integrating phenotypic causal networks in genome-wide association studies. *G3: Genes, Genomes, Genetics* **10**: 4439–4448.
- Whittaker, J. C., R. Thompson, and M. C. Denham, 2000 Marker-assisted selection using ridge regression. *Genetics Research* **75**: 249–252.
- Wolc, A., J. Arango, P. Settar, J. E. Fulton, N. P. O'Sullivan, *et al.*, 2016 Mixture models detect large effect qtl better than *gblup*

- 1 and result in more accurate and persistent predictions. *Journal*  
2 *of animal science and biotechnology* **7**: 1–6.
- 3 Xiong, Q., N. Ancona, E. R. Hauser, S. Mukherjee, and T. S.  
4 Furey, 2012 Integrating genetic and gene expression evidence  
5 into genome-wide association analysis of gene sets. *Genome*  
6 *research* **22**: 386–397.
- 7 Yang, J., S. H. Lee, M. E. Goddard, and P. M. Visscher, 2011 Gcta:  
8 a tool for genome-wide complex trait analysis. *The American*  
9 *Journal of Human Genetics* **88**: 76–82.
- 10 Zhou, X. and M. Stephens, 2014 Efficient multivariate linear  
11 mixed model algorithms for genome-wide association studies.  
12 *Nature methods* **11**: 407–409.
